# Supplementary material for: Insights into HIV-1 proviral transcription from integrative structure and dynamics of the Tat:AFF4:P-TEFb:TAR complex
Source: eLife journal article supplement (doi:10.7554/elife.15910), 2016-10-12
Supplement: supp [file elife-15910-supp-v1.zip]

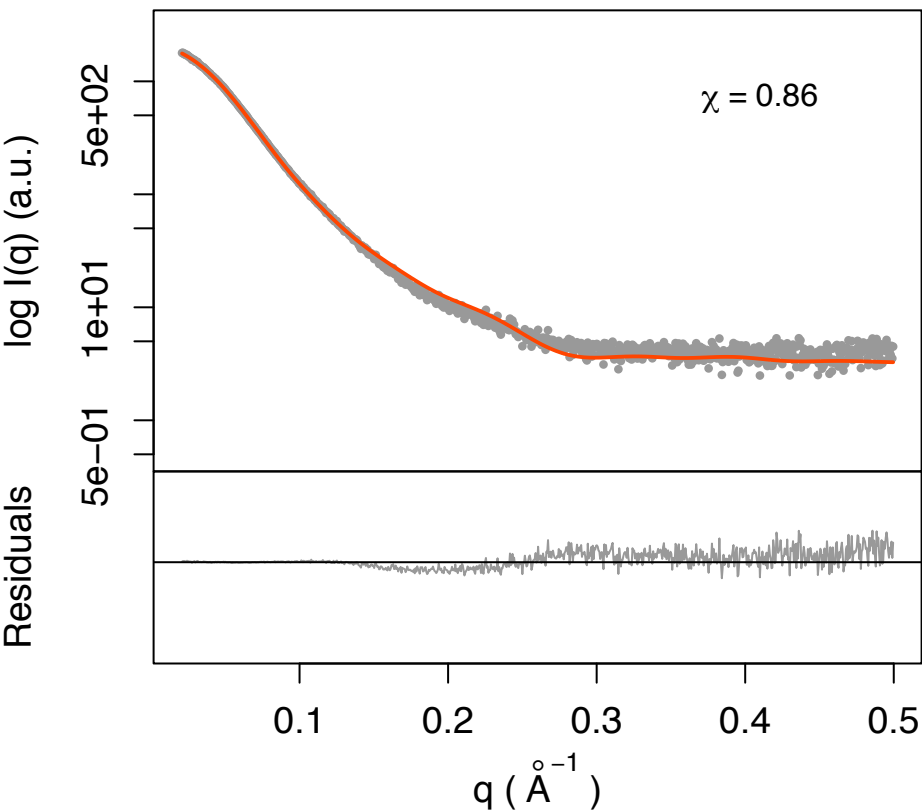

**Figure 5 Figure supplement 1.** Fit of integrative model and SAXS profile. The scattering profile calculated from the model matches the experimental profile with  $\chi = 0.86$ .
