# Supplementary material for: Insights into HIV-1 proviral transcription from integrative structure and dynamics of the Tat:AFF4:P-TEFb:TAR complex
Source: eLife journal article supplement (doi:10.7554/elife.15910), 2016-10-12
Supplement: supp [file elife-15910-supp-v1.zip]

Archive with 9 entries (9 files):
- elife_poa_e15910_Figure_2_figure_supplement_1.pdf
- elife_poa_e15910_Table_2_source_data_2.txt
- elife_poa_e15910_Figure_1_figure_supplement_2.pdf
- elife_poa_e15910_Figure_5_figure_supplement_1.pdf
- elife_poa_e15910_Figure_1_figure_supplement_1.pdf
- elife_poa_e15910_Table_2_source_data1.pdf
- elife_poa_e15910_Figure_4_figure_supplement_1.pdf
- elife_poa_e15910_Figure_4_figure_supplement_2.pdf
- elife_poa_e15910_Figure_1_figure_supplement_3.pdf
