# Supplementary material for: Insights into HIV-1 proviral transcription from integrative structure and dynamics of the Tat:AFF4:P-TEFb:TAR complex
Source: eLife journal article supplement (doi:10.7554/elife.15910), 2016-10-12
Supplement: supp [file elife-15910-supp-v1.zip › elife_poa_e15910_Figure_1_figure_supplement_2.pdf]

CycT1

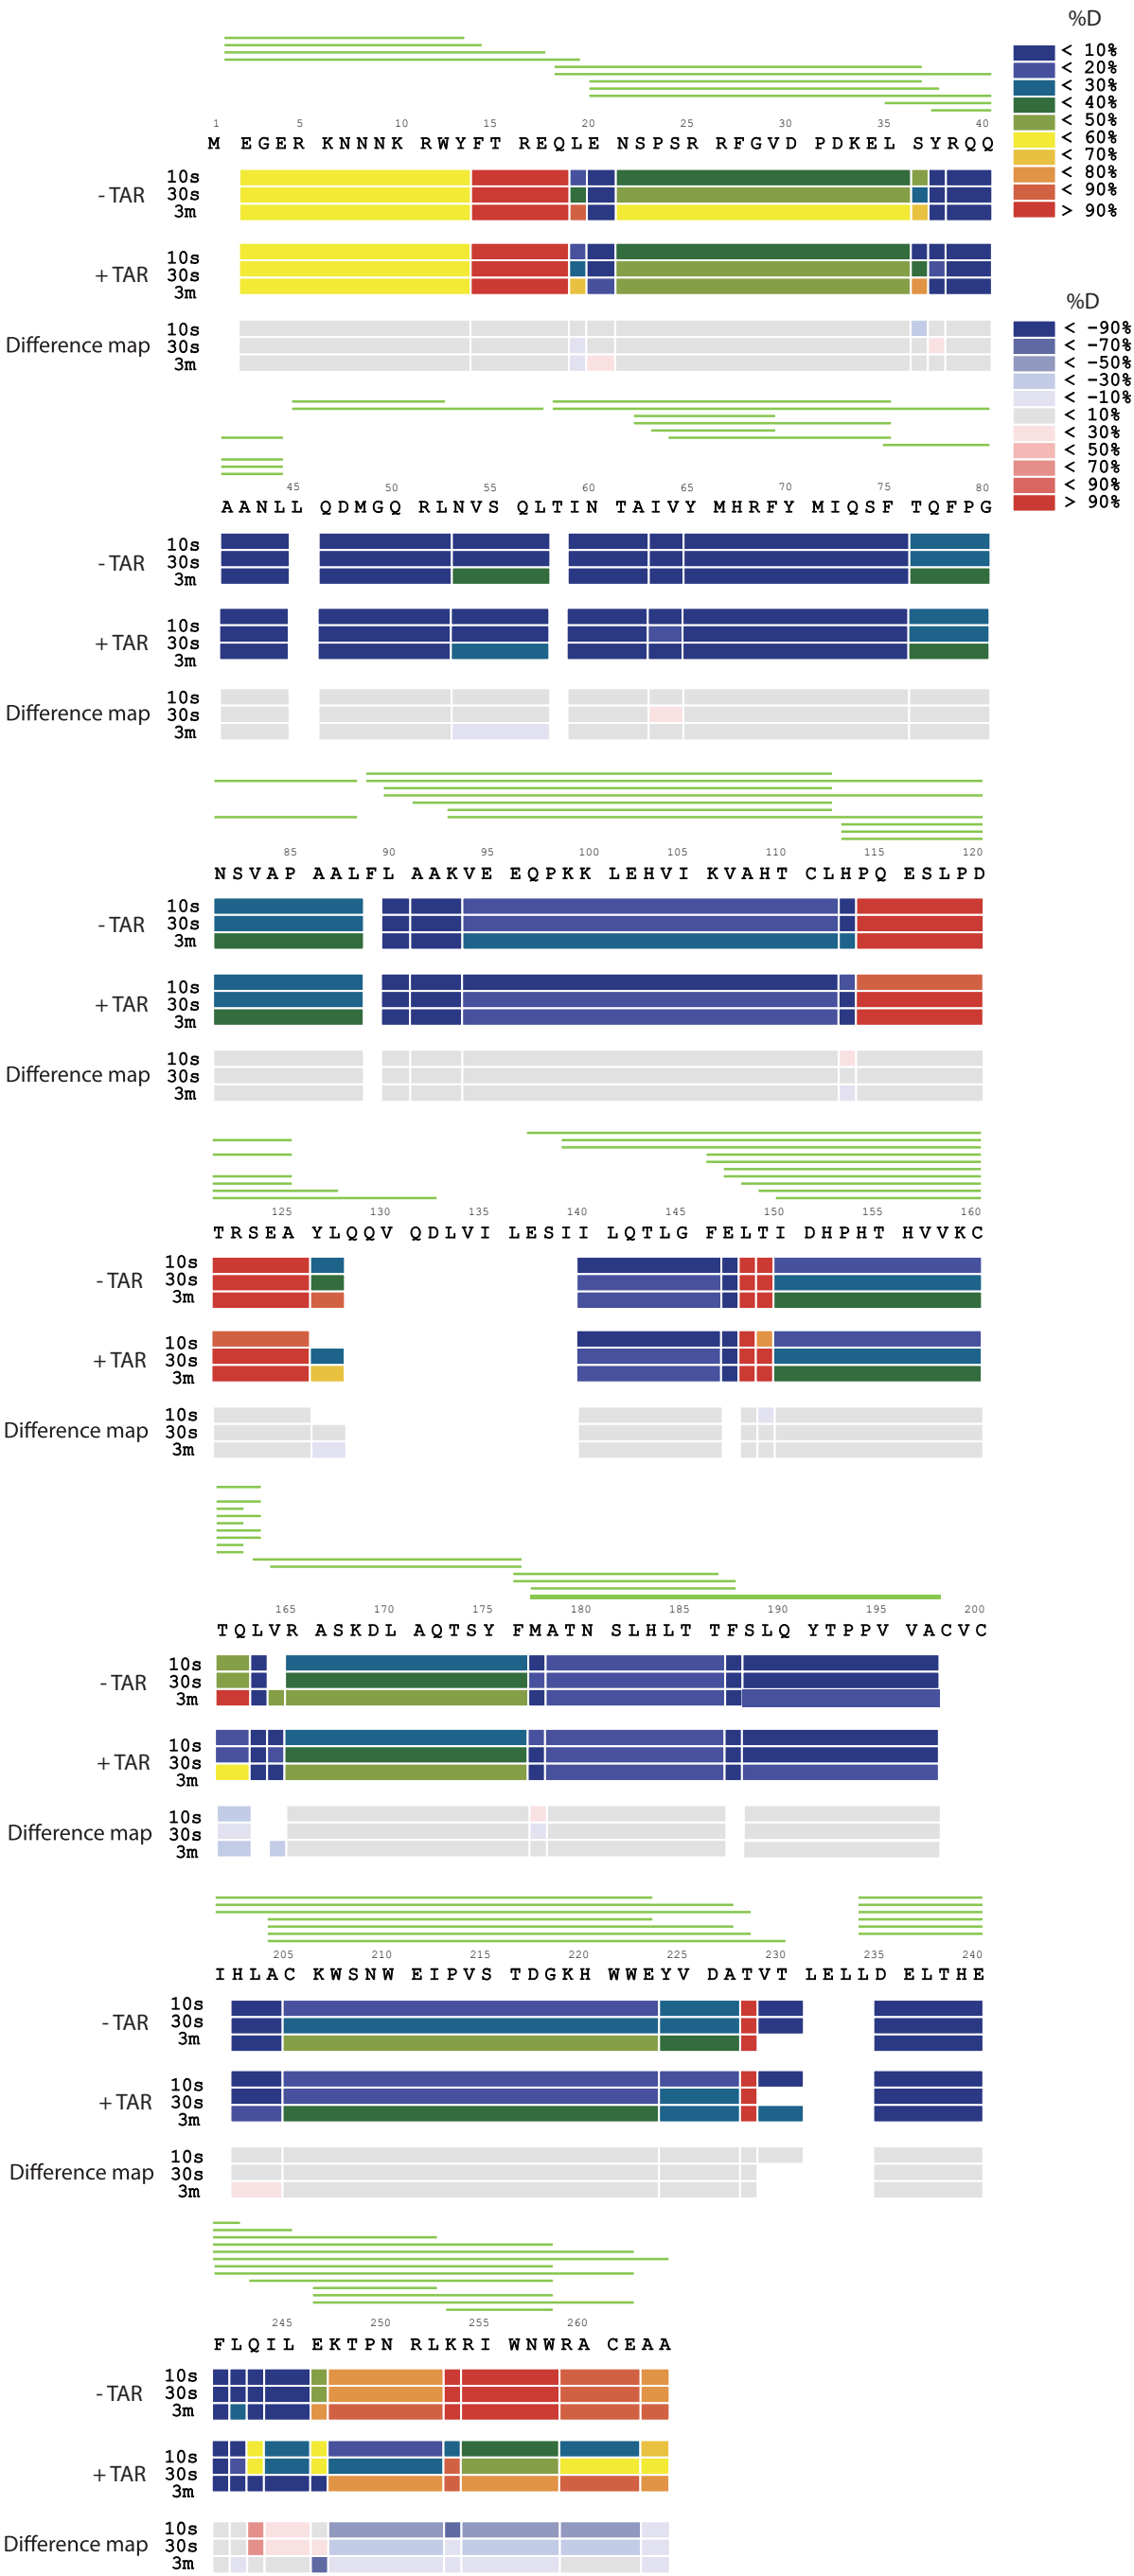

**Figure 1 Figure supplement 2:** Amide HD exchange results of CycT1 in the absence and presence of TAR. Each block indicates peptide analyzed. Each block contains three time points; from the top, ten seconds, 30 seconds and 3 min. The absolute deuteration levels of each segment and corresponding difference map at each time point are shown by different colors, as indicated on the right of the Figure. Peptide coverage is shown above the deuteration map.
