# Supplementary material for: Insights into HIV-1 proviral transcription from integrative structure and dynamics of the Tat:AFF4:P-TEFb:TAR complex
Source: eLife journal article supplement (doi:10.7554/elife.15910), 2016-10-12
Supplement: supp [file elife-15910-supp-v1.zip › elife_poa_e15910_Figure_1_figure_supplement_3.pdf]

CDK9

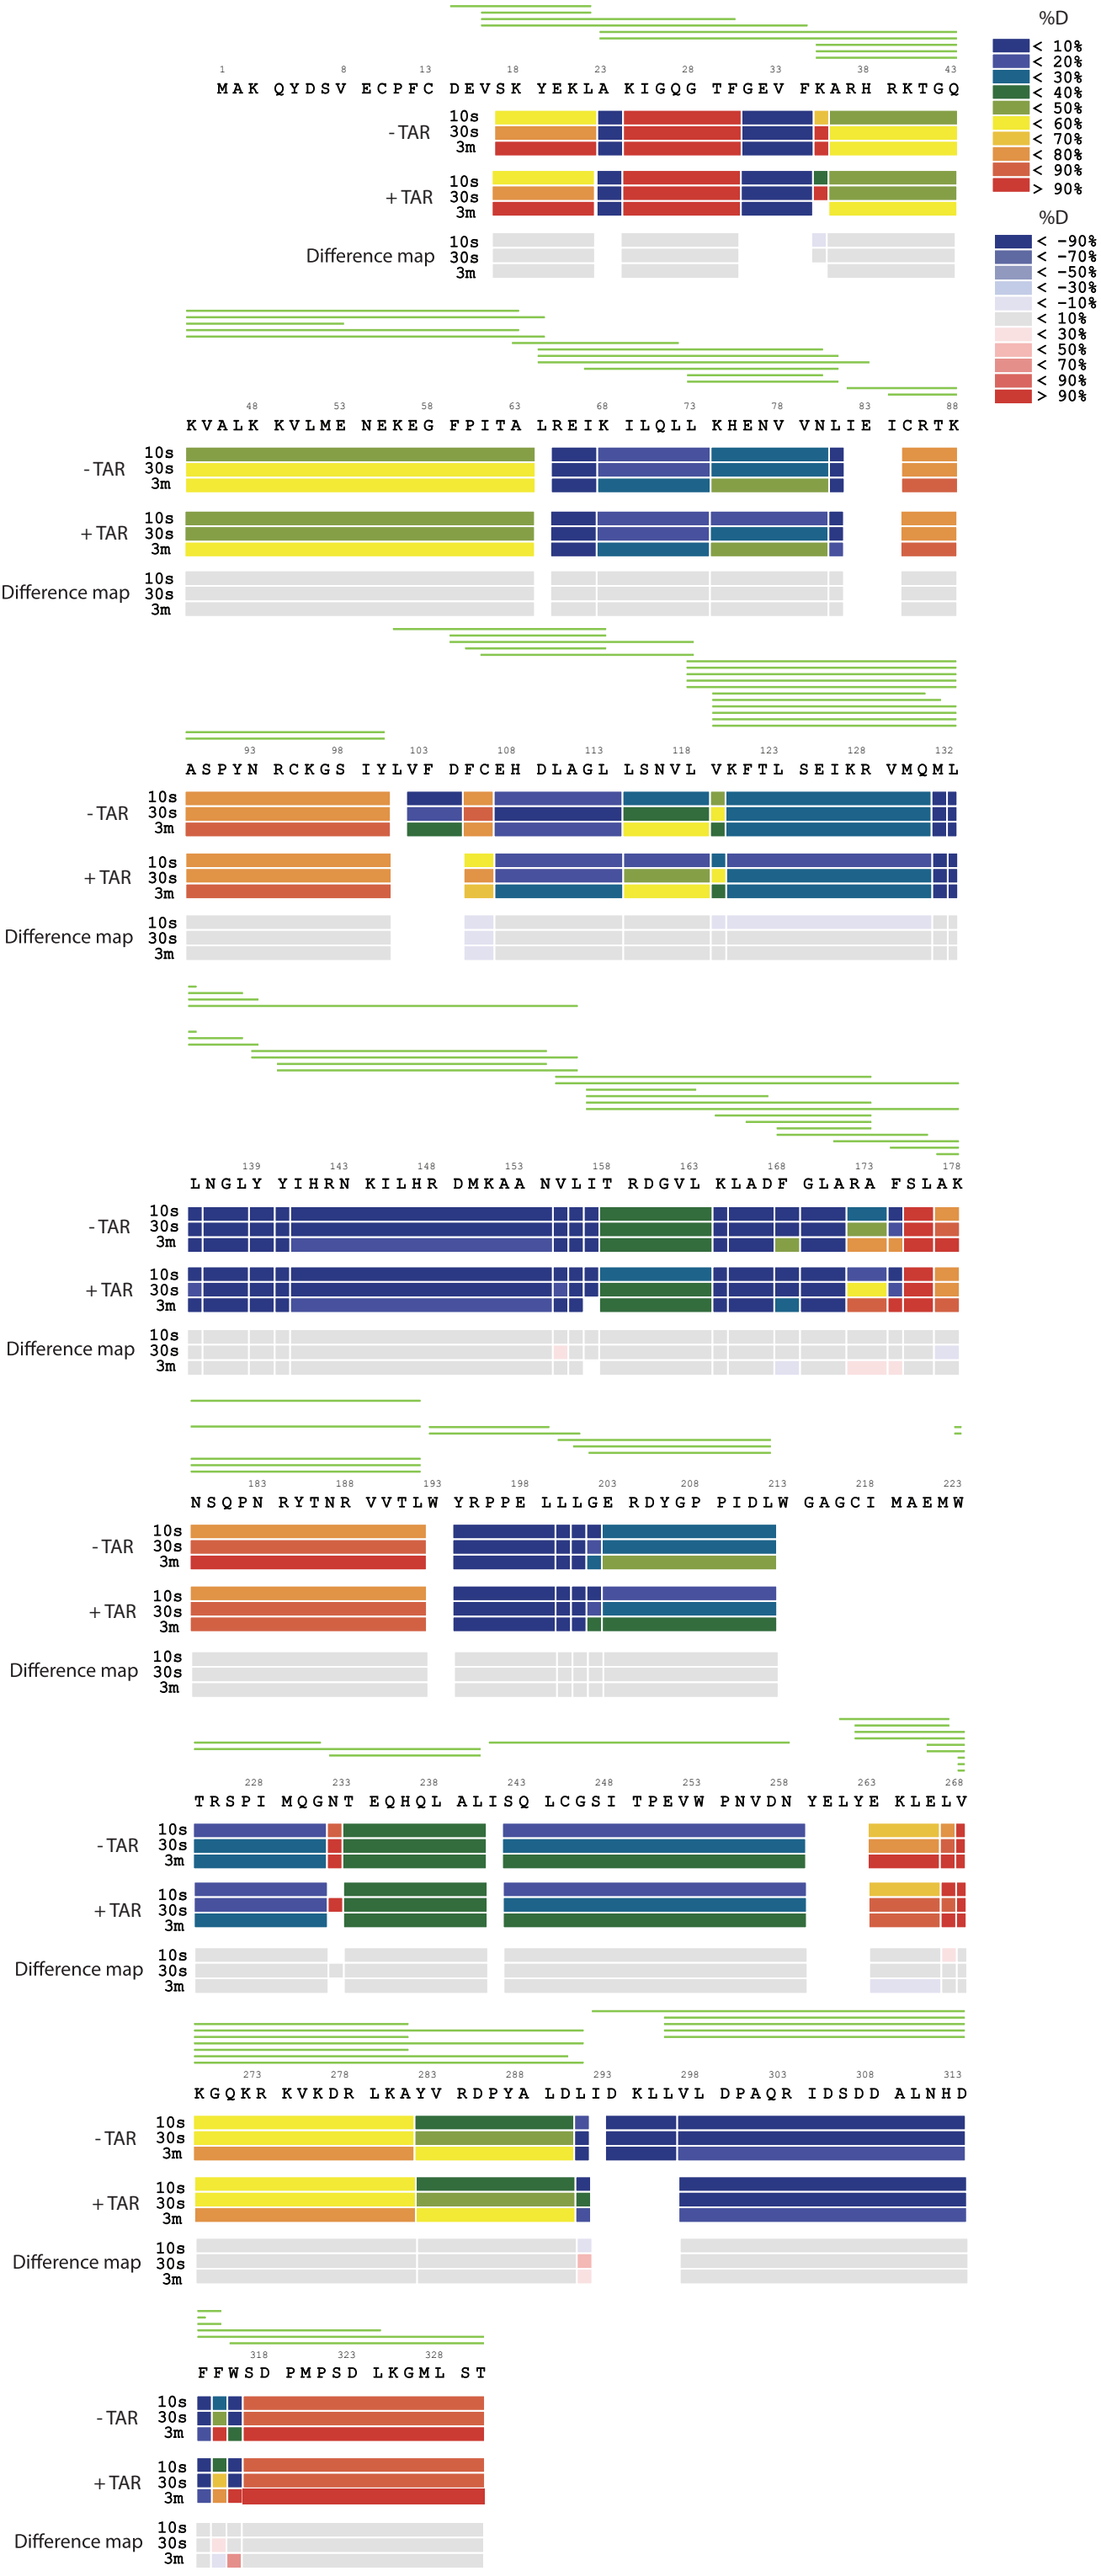

**Figure 1 Figure supplement 3:** Amide HD exchange results of CDK9 in the absence and presence of TAR. Each block indicates peptide analyzed. Each block contains three time-points; from the top, ten seconds, 30 seconds and 3 min. The absolute deuteration levels of each segment and corresponding difference map at each time-point are shown by different colors, as indicated on the right of the Figure. Peptide coverage is shown above the deuteration map.
