# Supplementary material for: Insights into HIV-1 proviral transcription from integrative structure and dynamics of the Tat:AFF4:P-TEFb:TAR complex
Source: eLife journal article supplement (doi:10.7554/elife.15910), 2016-10-12
Supplement: supp [file elife-15910-supp-v1.zip › elife_poa_e15910_Figure_2_figure_supplement_1.pdf]

# No SHAPE control traces

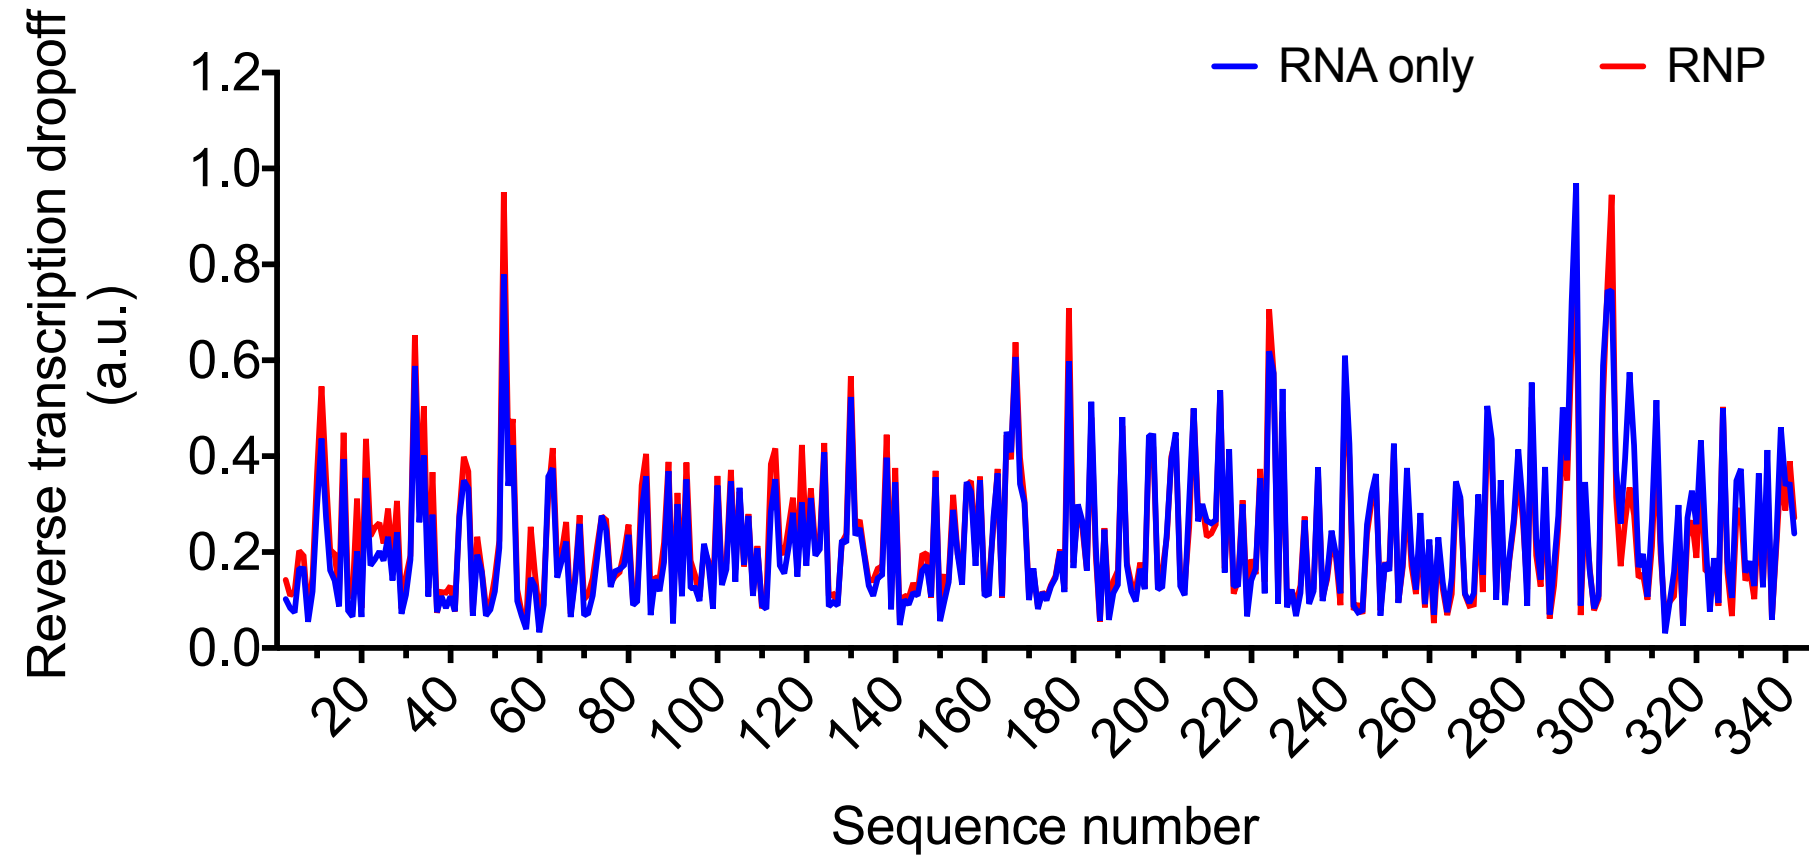

**Figure 2 Figure supplement 1.**

Control trace for reverse transcription reaction with HIV-1 5'UTR without SHAPE reagent.
