# Supplementary material for: Insights into HIV-1 proviral transcription from integrative structure and dynamics of the Tat:AFF4:P-TEFb:TAR complex
Source: eLife journal article supplement (doi:10.7554/elife.15910), 2016-10-12
Supplement: supp [file elife-15910-supp-v1.zip › elife_poa_e15910_Figure_4_figure_supplement_1.pdf]

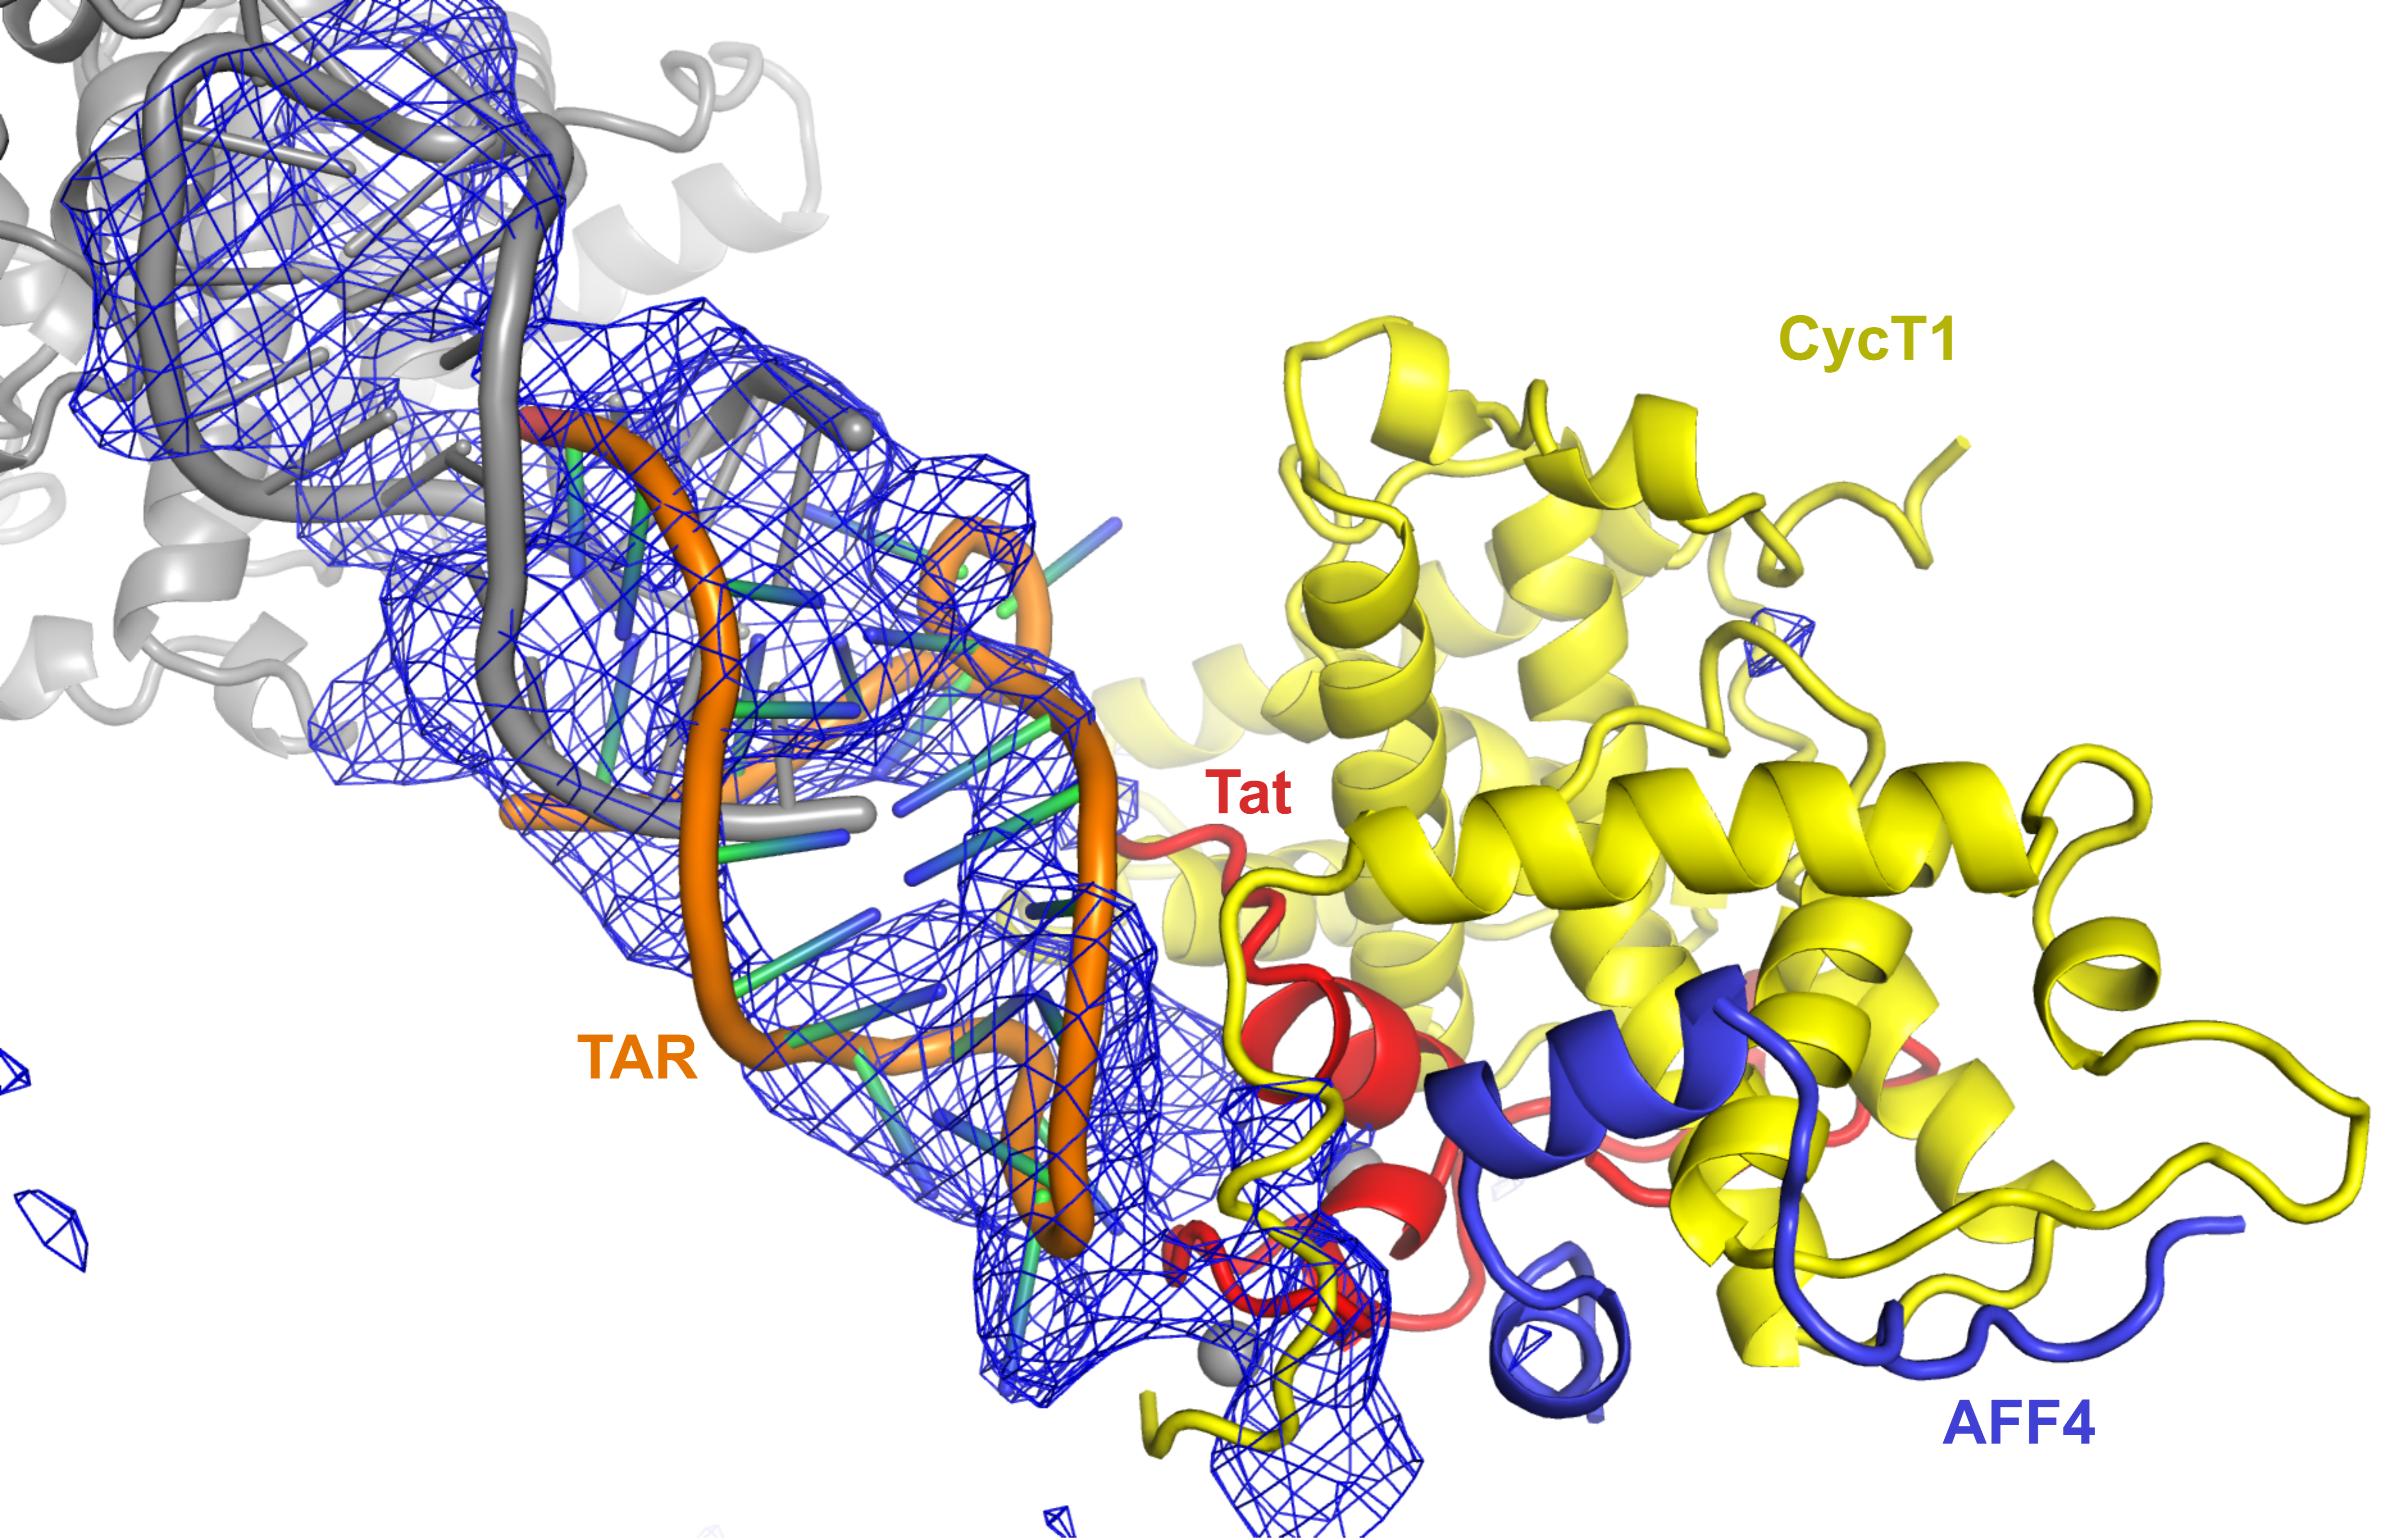

**Figure 4 Figure supplement 1.** Fo-Fc density map ( $2\sigma$ ) after molecular replacement and refinement with Tat:AFF4:P-TEFb only. Clear density for TAR allowed placement of a TAR molecule (PDB ID 1ARJ). TAR is mediating important crystal contacts by interacting with a symmetry related TAR (grey).
