# Supplementary material for: Insights into HIV-1 proviral transcription from integrative structure and dynamics of the Tat:AFF4:P-TEFb:TAR complex
Source: eLife journal article supplement (doi:10.7554/elife.15910), 2016-10-12
Supplement: supp [file elife-15910-supp-v1.zip › elife_poa_e15910_Figure_4_figure_supplement_2.pdf]

**A**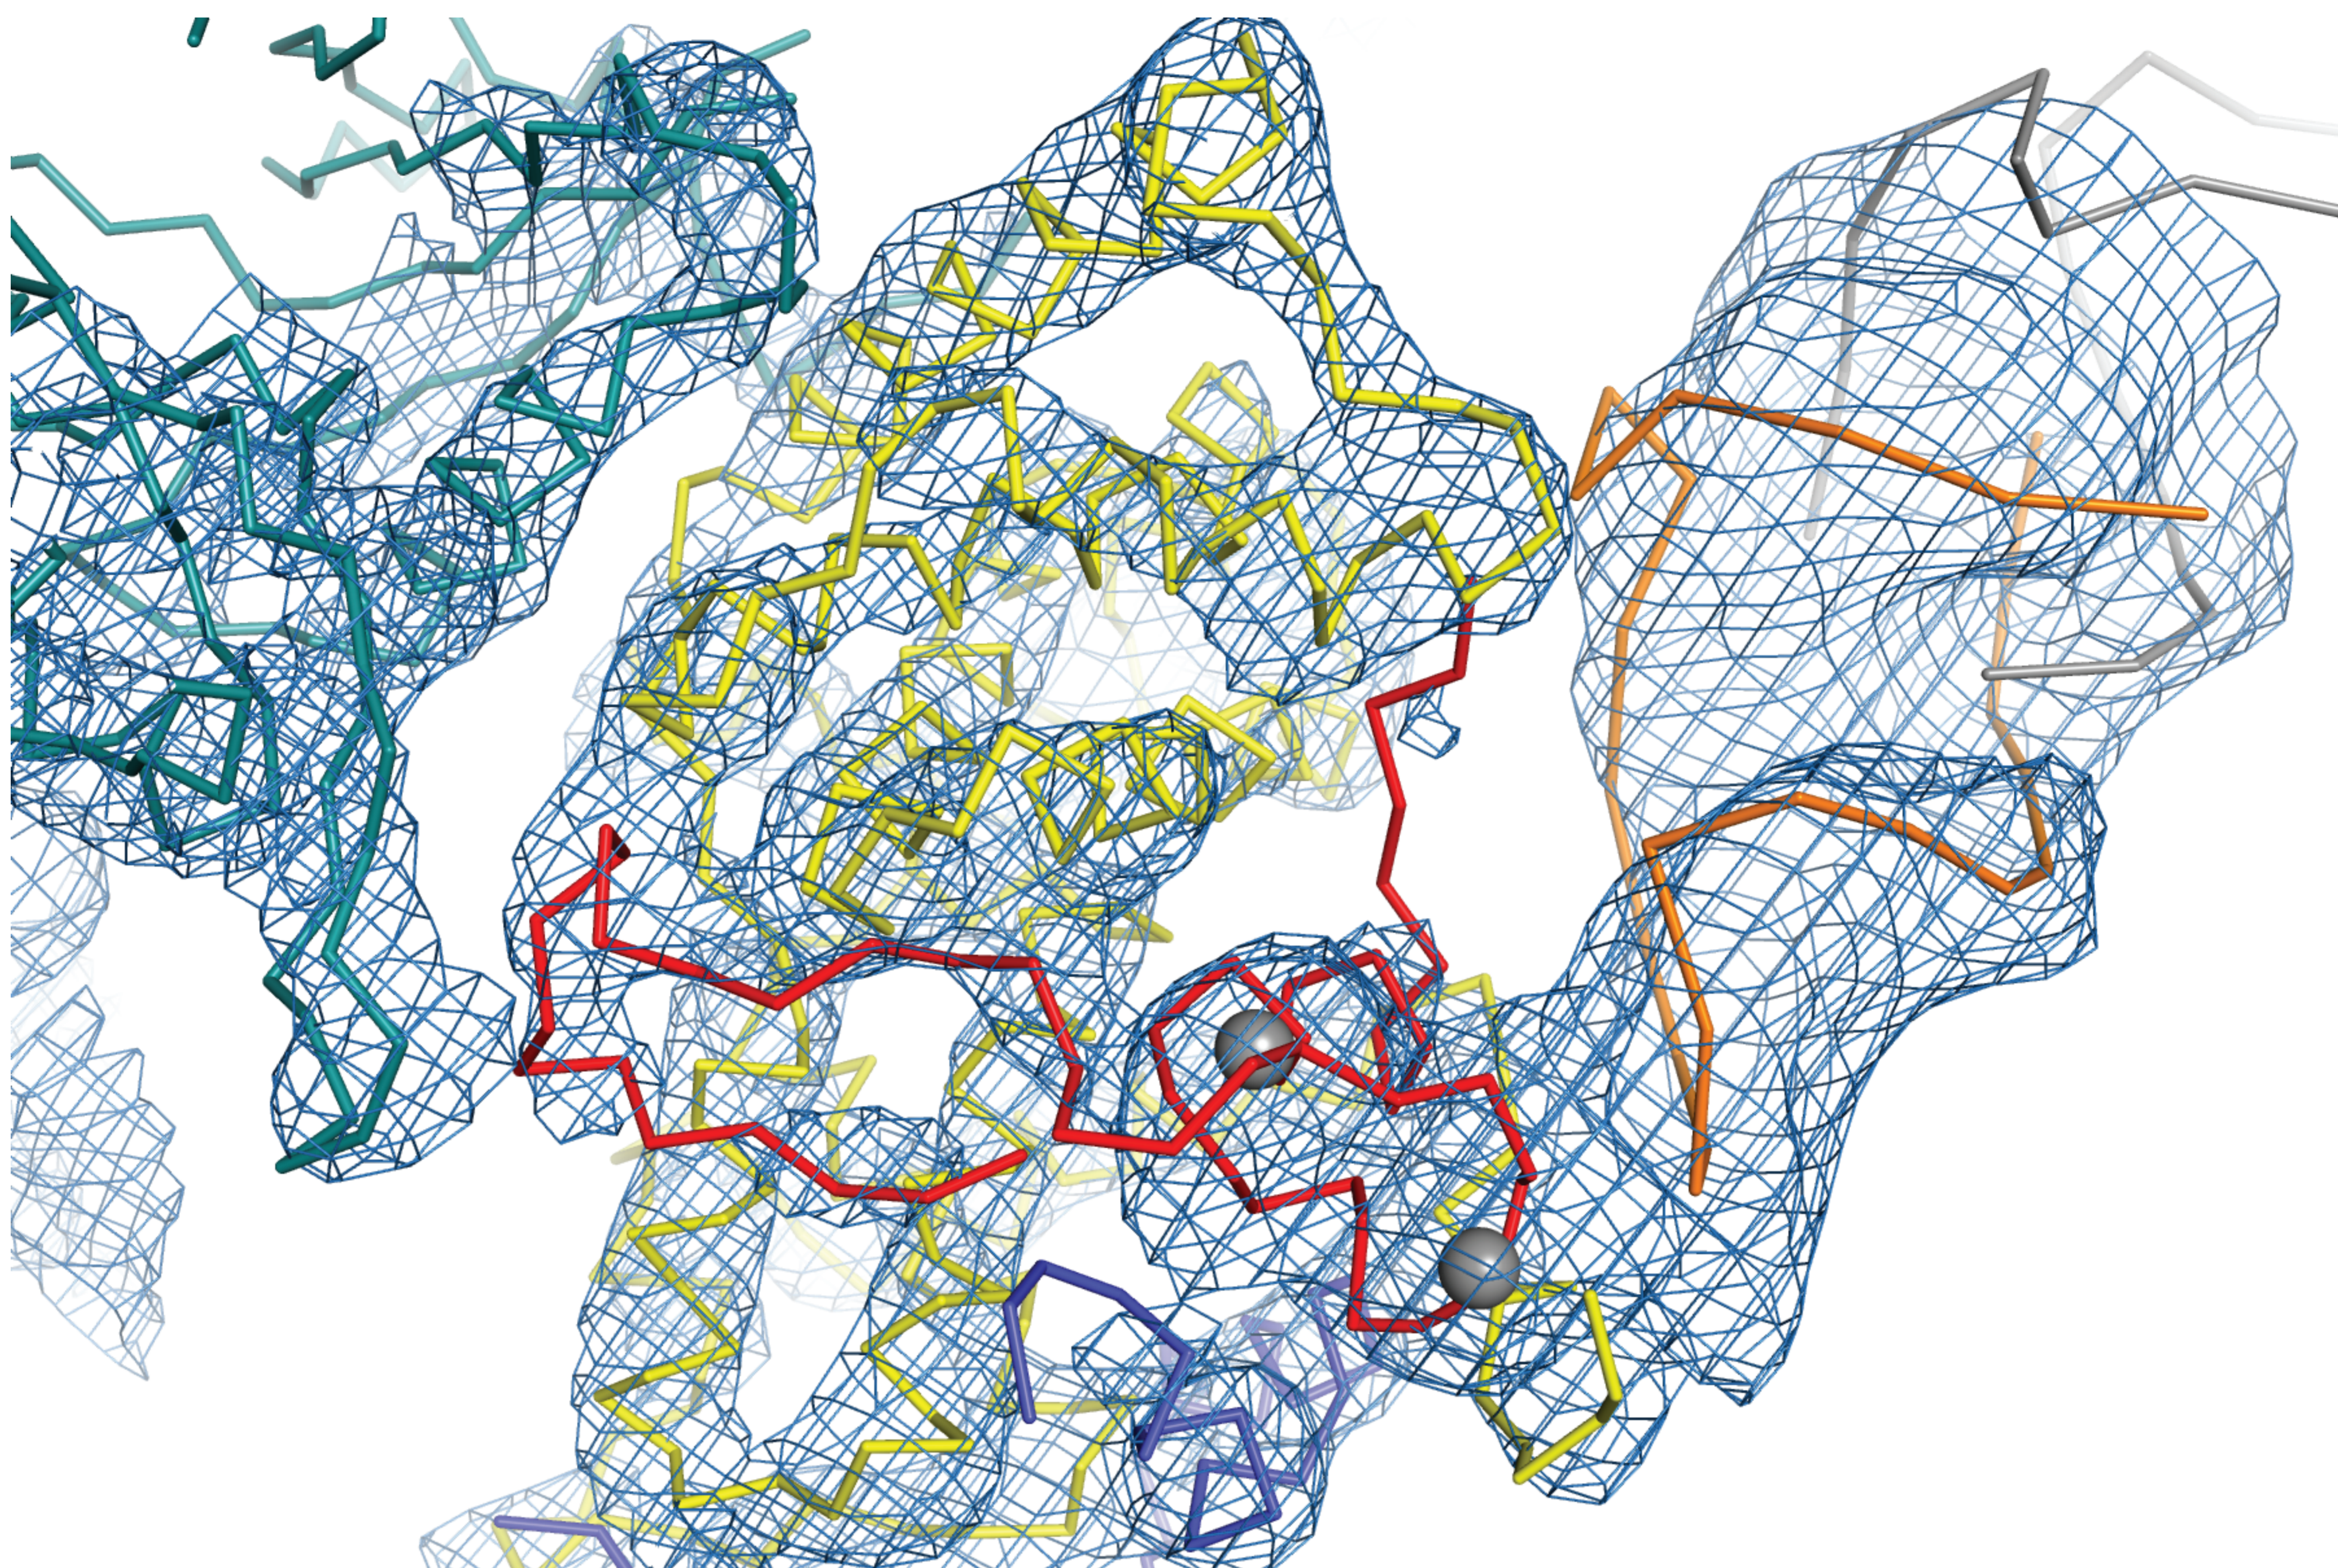**B**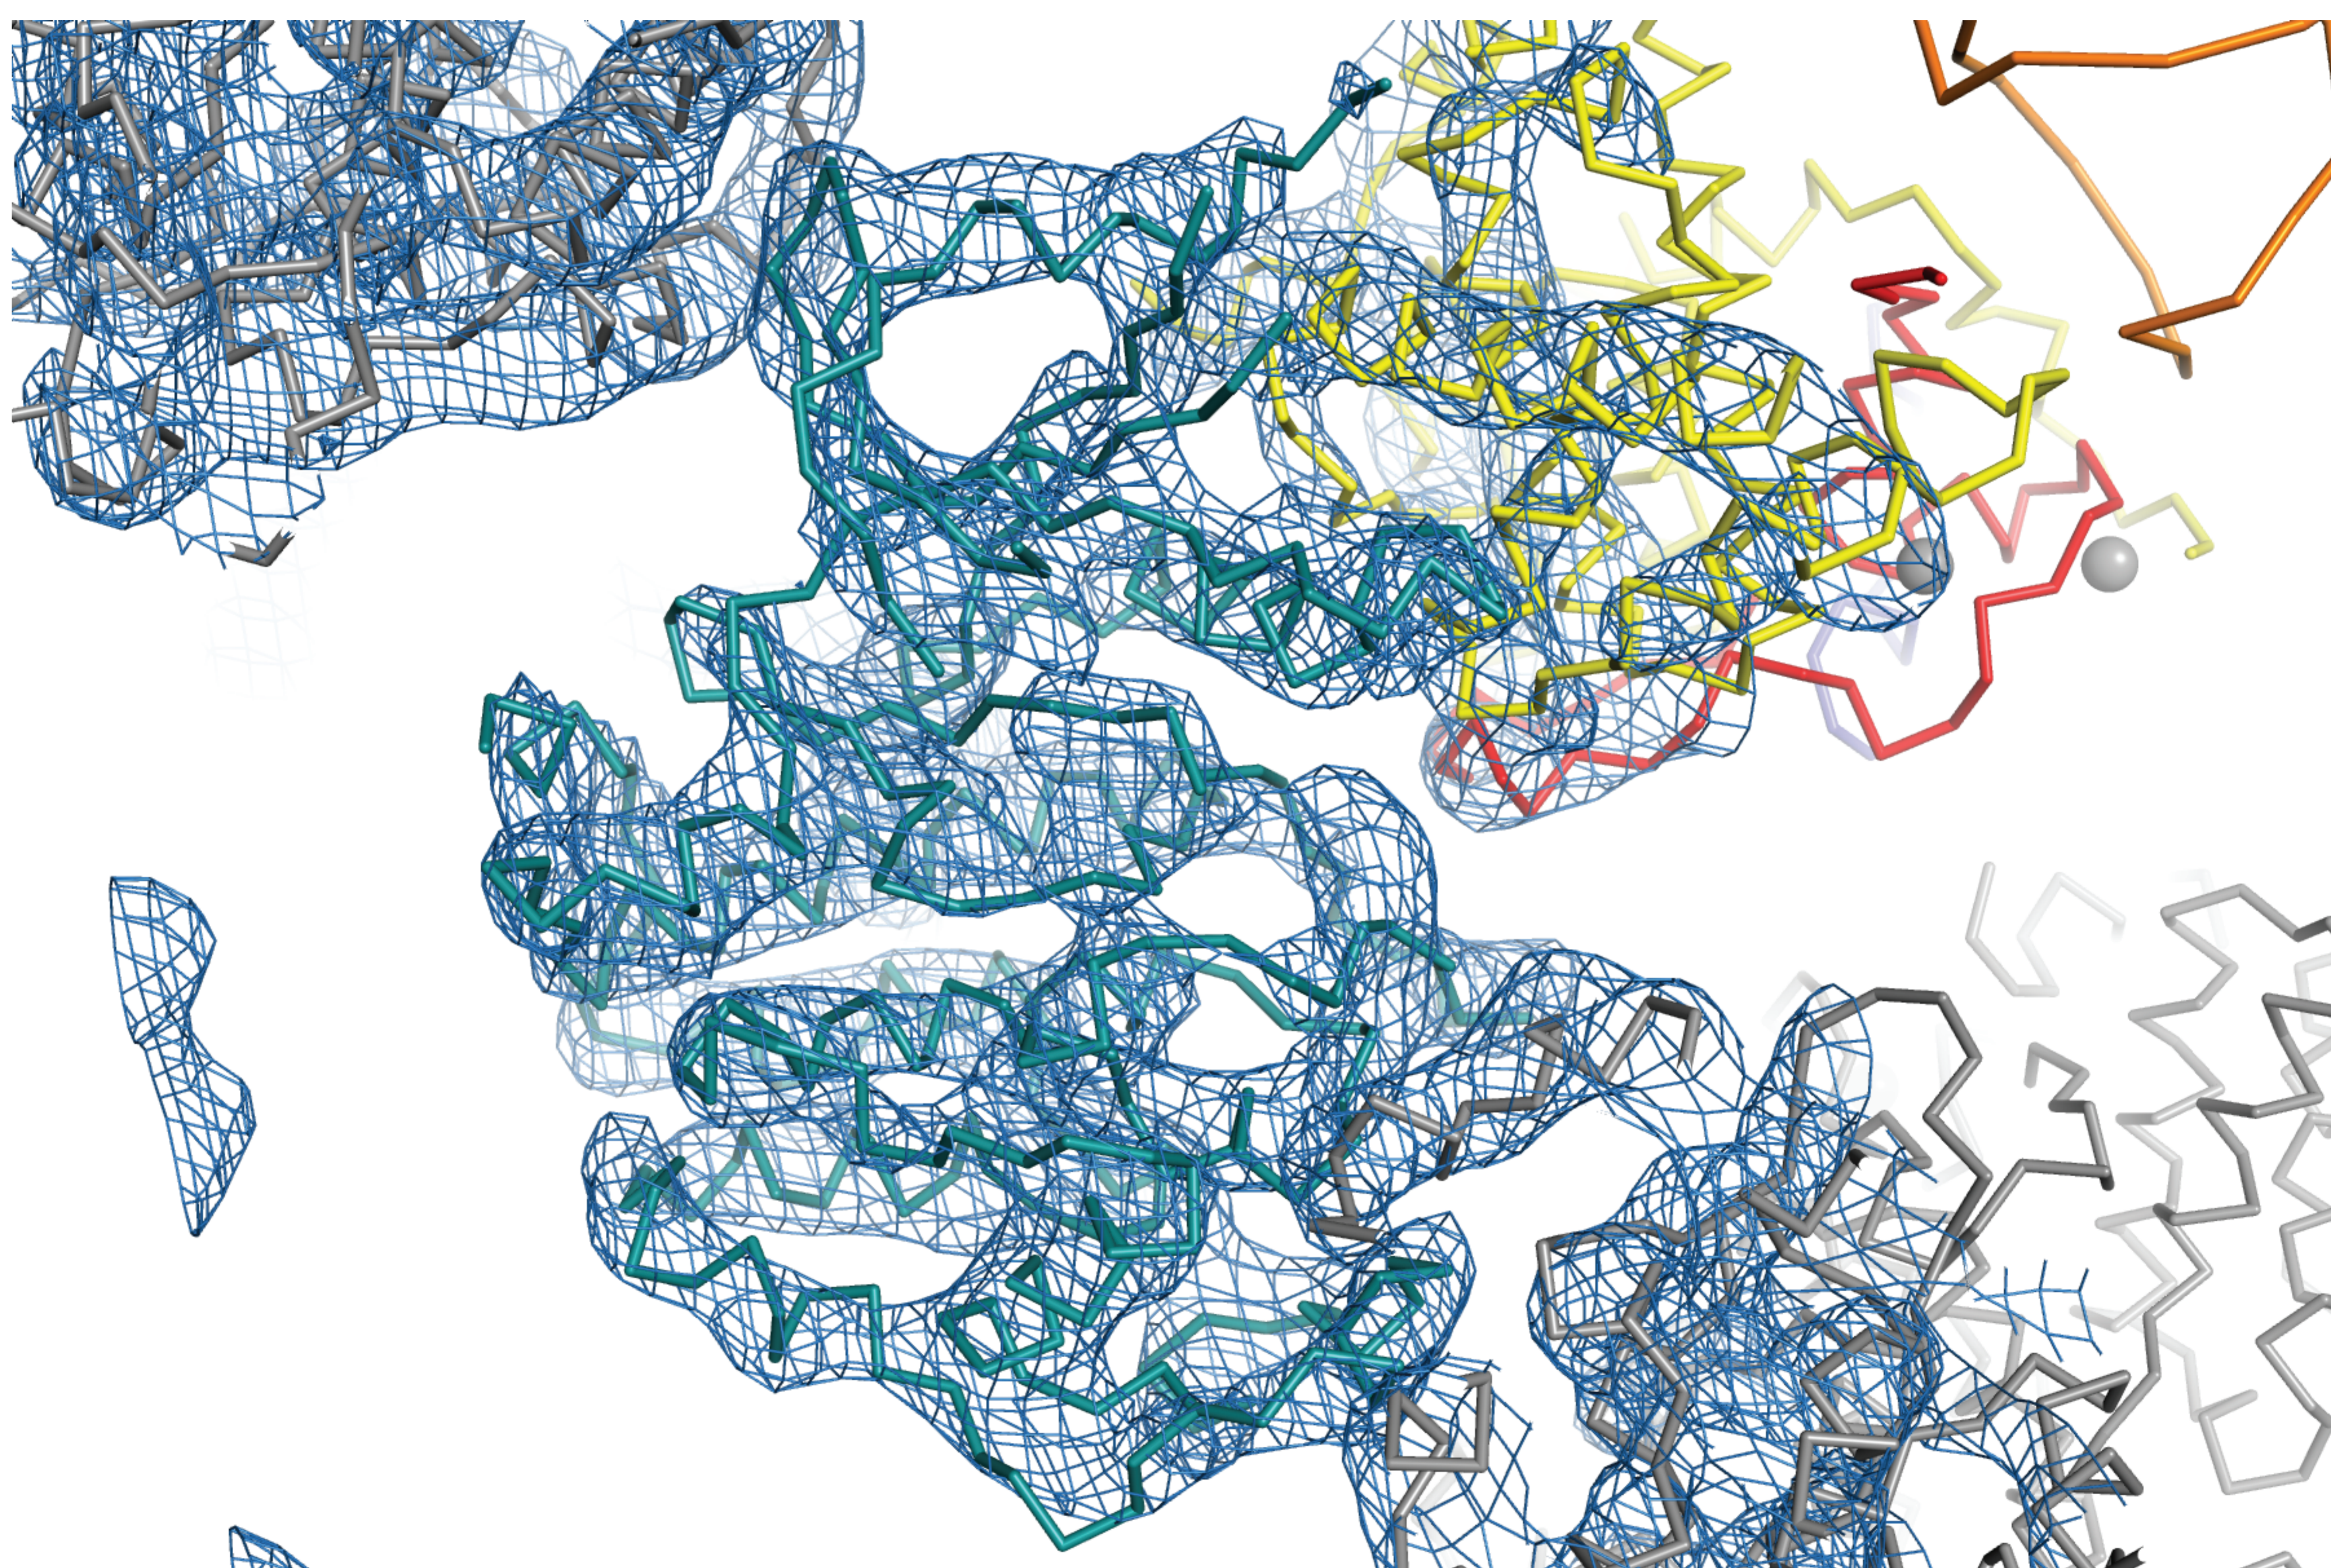

**Figure 4 Figure supplement 2.** 2FoFc electron density map for the refined Tat:AFF4:P-TEFb complex with TAR. Density around Cyclin T1, Tat, and TAR is contoured at 1.4 sigma (A). Density for CDK9 (B) is contoured at 1.3 sigma.
