# Supplementary material for: Insights into HIV-1 proviral transcription from integrative structure and dynamics of the Tat:AFF4:P-TEFb:TAR complex
Source: eLife journal article supplement (doi:10.7554/elife.15910), 2016-10-12
Supplement: supp [file elife-15910-supp-v1.zip › elife_poa_e15910_Table_2_source_data1.pdf]

A

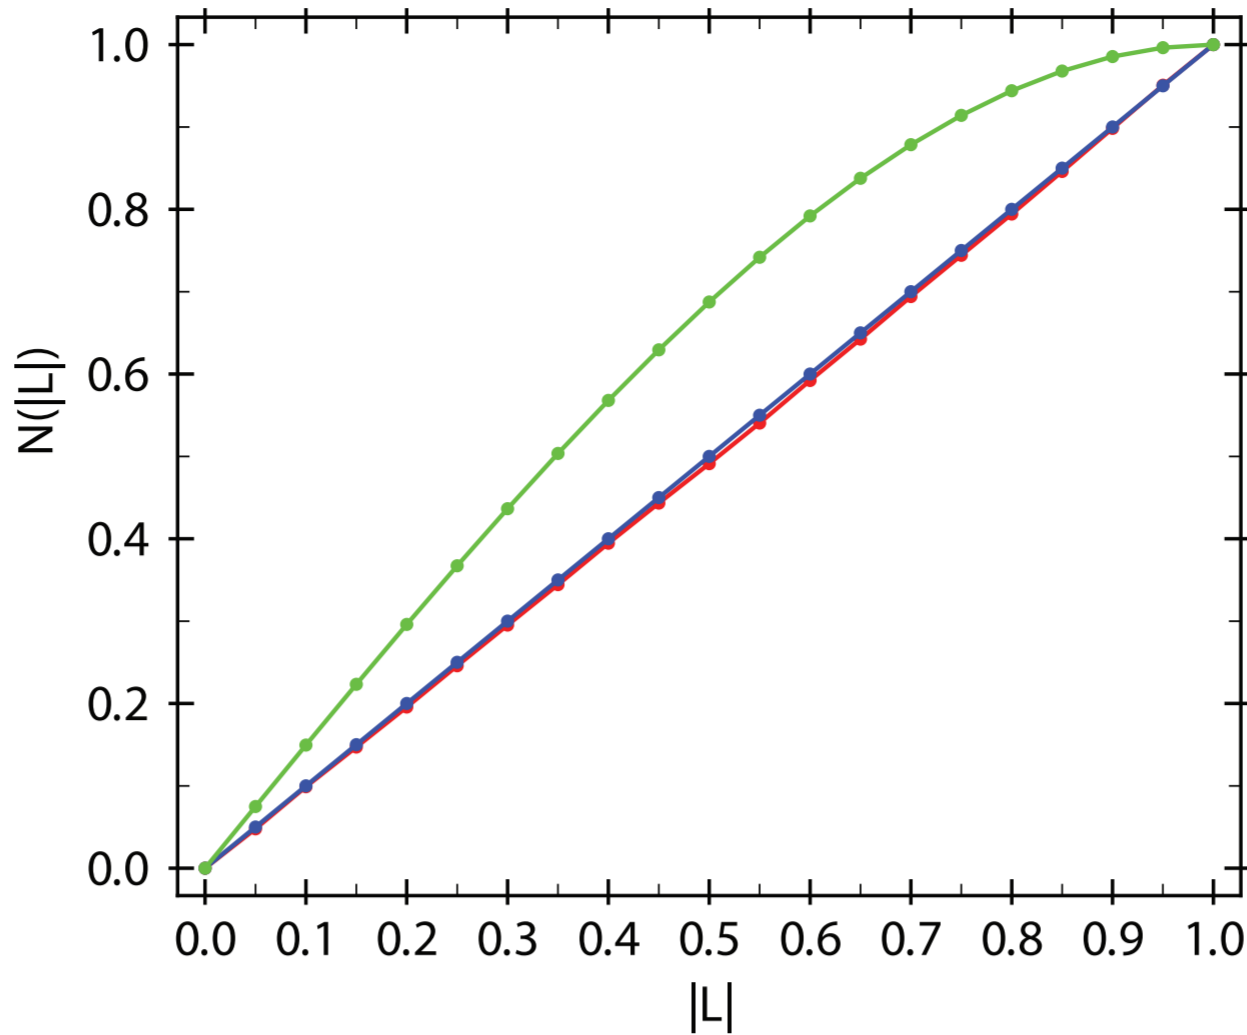

B

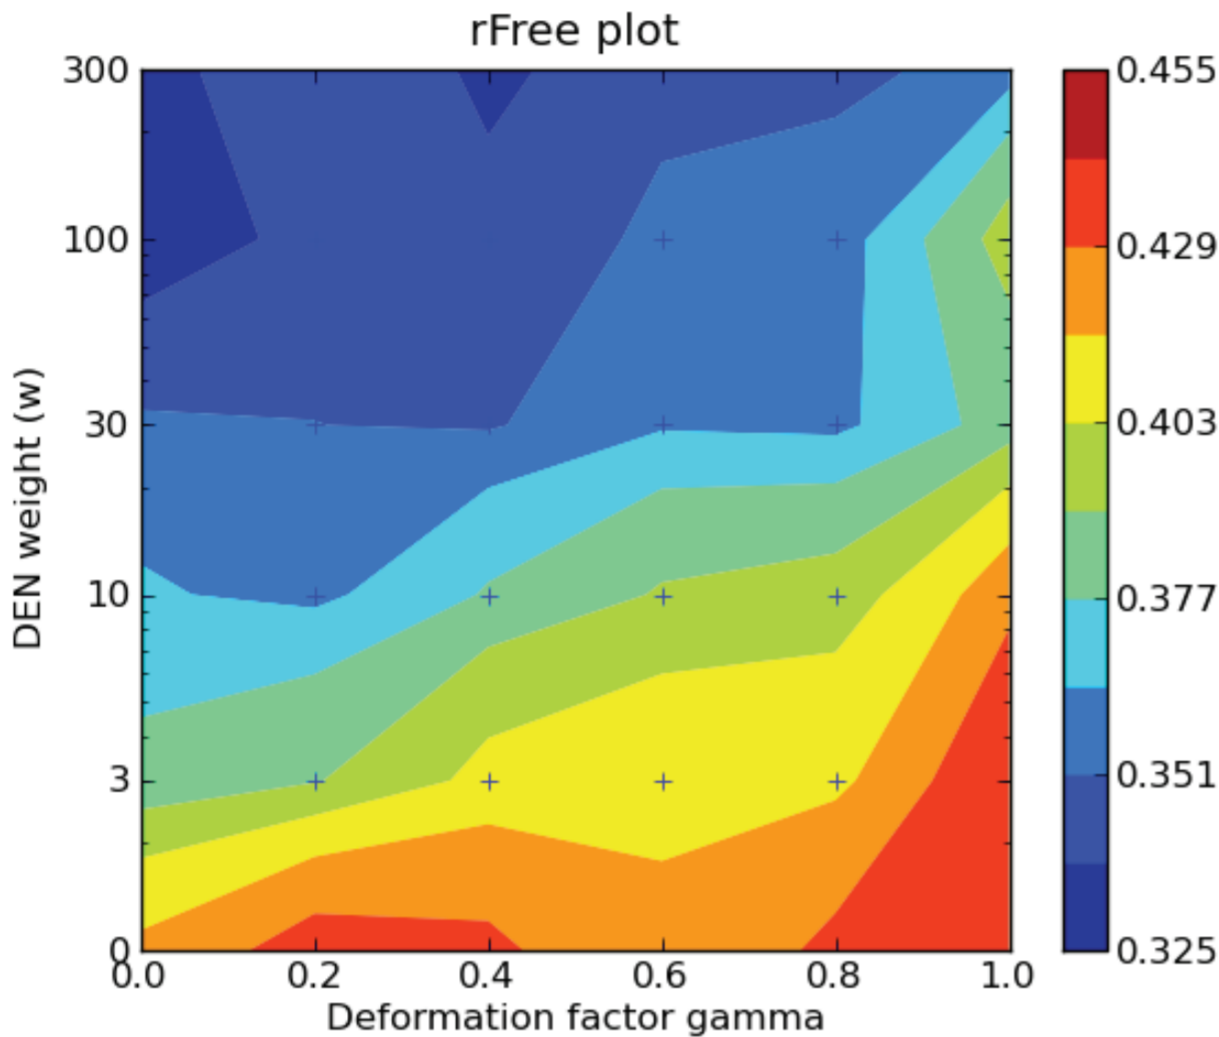

C

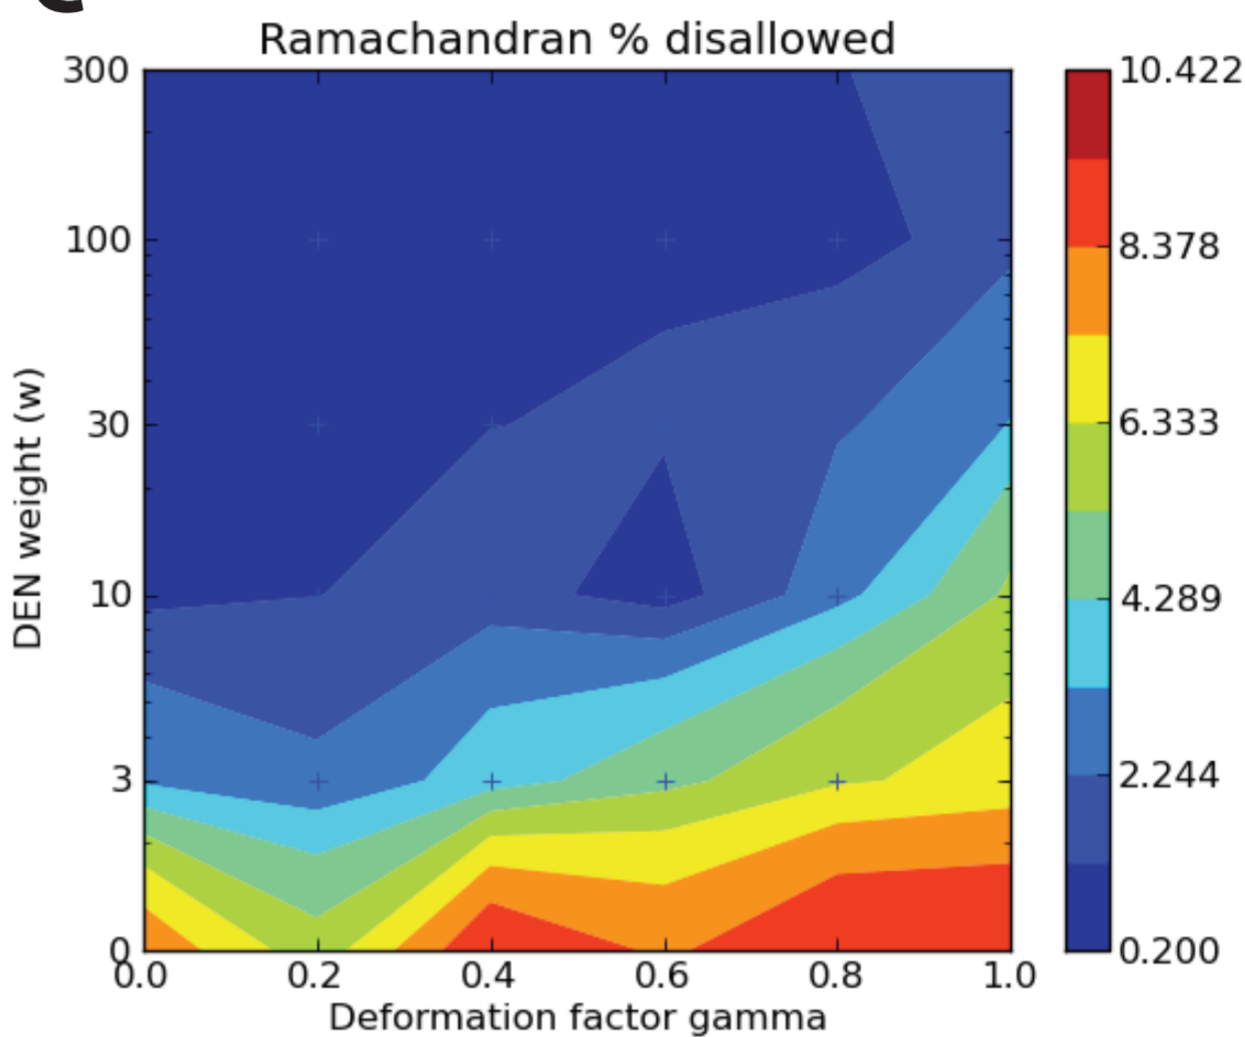

D

```
Log-file of twinning analysis in CNS

>>>> results of twinning detection
>>>> resolution: 500.0 - 5.9 Å
>>>> sg= P3(2)21 a= 146.87 b= 146.87 c= 103.75 alpha= 90 beta= 90 gamma= 120
>>>> reflection file 1 : scaled_new.cns
>>>> reflections with |Fobs|/sigma_F < 0.0 rejected
>>>> reflections with |Fobs| > 10000 * rms(Fobs) rejected
>>>> theoretical total number of refl. in resol. range:  3596 ( 100.0 %)
>>>> number of unobserved reflections (no entry):      1 (  0.0 %)
>>>> number of reflections rejected:                    0 (  0.0 %)
>>>> total number of reflections used:                 3595 ( 100.0 %)
>>>> number of reflections in working set:             3595 ( 100.0 %)

=====

testing for perfect twinning

column 1:  bin number
columns 2:  upper resolution limit
columns 3:  lower resolution limit
column 4:  number of reflections in bin
column 5:  average resolution in bin
column 6:  <|I|^2>/(<|I|>)^2
column 7:  <|F|>^2/<|F|^2>
column 8:  fraction of theoretically complete data

<|I|^2>/(<|I|>)^2 is 2.0 for untwinned data, 1.5 for twinned data
<|F|>^2/<|F|^2> is 0.785 for untwinned data, 0.865 for twinned data

#bin | resolution range | #refl |
1 11.29 500.01   390  16.2548  6.9180  0.6679  0.7117
2  8.96 11.29    431   9.9532  3.1956  0.6935  0.8225
3  7.83  8.96    423   8.3476  4.0320  0.6877  0.8426
4  7.11  7.83    443   7.4507  4.5658  0.6947  0.8619
5  6.60  7.11    444   6.8389  2.3690  0.8300  0.8792
6  6.21  6.60    434   6.3962  1.9642  0.8926  0.8697
7  5.90  6.21    448   6.0480  1.7855  0.8997  0.8889

-----averages-over-all-bins-----
<|I|^2>/(<|I|>)^2 =  3.4875 (2.0  for untwinned, 1.5  for twinned)
(<|F|>)^2/<|F|^2> =  0.7690 (0.785 for untwinned, 0.865 for twinned)

=====

testing for partial twinning (using statistical method of Yeates)

>>>> testing for twinning operator= -h,-k,l

<H> = 0.50707: twinning fraction= -.007 (434 reflections used)
<H^2> = 0.34743: twinning fraction= -.010 (434 reflections used)

=====
```

**Table 2 Source data 1.** Diffraction data and refinement analysis. Twinning analysis by L-test in Ctruncate (A) and Xtriage indicate no twinning. Blue curve is acentric untwinned data, green curve acentric twinned data, and red curve observed data from Tat:AFF4:P-TEFb-TAR co-crystal. (B, C) Optimization of DEN refinement parameters using the web service for low resolution crystal structure refinement (<https://portal.sbgrid.org/d/apps/den/>). (D) Logfile of twinning analysis in CNS.
