# Supplementary material for: Insights into HIV-1 proviral transcription from integrative structure and dynamics of the Tat:AFF4:P-TEFb:TAR complex
Source: eLife journal article supplement (doi:10.7554/elife.15910), 2016-10-12
Supplement: supp [file elife-15910-supp-v1.zip › elife_poa_e15910_Table_2_source_data_2.txt]

 RSCC and RSR=sum|r-r_calc|/sum[r+r_calc| using 2fofc map and D*Fcalc
     #   resid  segid  RSCC    1-RSCC  RSR
     1   8      A      0.851   0.149   0.390
     2   9      A      0.976   0.024   0.241
     3   10     A      0.943   0.057   0.065
     4   11     A      0.986   0.014   0.054
     5   12     A      0.988   0.012   0.144
     6   13     A      0.976   0.024   0.096
     7   14     A      0.992   0.008   0.129
     8   15     A      0.986   0.014   0.105
     9   16     A      0.993   0.007   0.092
    10   17     A      0.994   0.006   0.123
    11   18     A      0.995   0.005   0.108
    12   19     A      0.997   0.003   0.087
    13   20     A      0.959   0.041   0.132
    14   21     A      0.982   0.018   0.083
    15   22     A      0.987   0.013   0.106
    16   23     A      0.970   0.030   0.258
    17   24     A      0.964   0.036   0.319
    18   25     A      0.997   0.003   0.130
    19   26     A      0.683   0.317   0.655
    20   31     A      0.654   0.346   0.797
    21   32     A      0.346   0.654   0.465
    22   33     A      0.982   0.018   0.095
    23   34     A      0.976   0.024   0.104
    24   35     A      0.996   0.004   0.108
    25   36     A      0.994   0.006   0.146
    26   37     A      0.961   0.039   0.236
    27   38     A      0.996   0.004   0.106
    28   39     A      0.984   0.016   0.164
    29   40     A      0.981   0.019   0.109
    30   41     A      0.978   0.022   0.126
    31   42     A      0.994   0.006   0.173
    32   43     A      0.981   0.019   0.215
    33   44     A      0.969   0.031   0.176
    34   45     A      0.982   0.018   0.092
    35   46     A      0.998   0.002   0.214
    36   47     A      0.998   0.002   0.107
    37   48     A      0.983   0.017   0.097
    38   49     A      0.961   0.039   0.186
    39   50     A      0.990   0.010   0.182
    40   51     A      0.835   0.165   0.526
    41   52     A      0.943   0.057   0.126
    42   53     A      0.977   0.023   0.117
    43   54     A      0.919   0.081   0.065
    44   55     A      0.968   0.032   0.085
    45   56     A      0.965   0.035   0.193
    46   57     A      0.950   0.050   0.108
    47   58     A      0.995   0.005   0.110
    48   59     A      0.990   0.010   0.196
    49   60     A      0.986   0.014   0.086
    50   61     A      0.990   0.010   0.074
    51   62     A      0.966   0.034   0.182
    52   63     A      0.994   0.006   0.371
    53   64     A      0.996   0.004   0.078
    54   65     A      0.991   0.009   0.051
    55   66     A      0.977   0.023   0.185
    56   67     A      0.999   0.001   0.150
    57   68     A      0.983   0.017   0.116
    58   69     A      0.995   0.005   0.100
    59   70     A      0.996   0.004   0.139
    60   71     A      0.993   0.007   0.111
    61   72     A      0.997   0.003   0.110
    62   73     A      0.996   0.004   0.124
    63   74     A      0.966   0.034   0.098
    64   75     A      0.983   0.017   0.141
    65   76     A      0.975   0.025   0.151
    66   77     A      0.994   0.006   0.143
    67   78     A      0.995   0.005   0.090
    68   79     A      0.997   0.003   0.137
    69   80     A      0.962   0.038   0.057
    70   81     A      0.993   0.007   0.143
    71   82     A      0.998   0.002   0.070
    72   83     A      0.983   0.017   0.061
    73   84     A      0.989   0.011   0.118
    74   85     A      0.989   0.011   0.109
    75   86     A      0.970   0.030   0.104
    76   87     A      0.983   0.017   0.098
    77   88     A      0.402   0.598   0.649
    78   97     A      0.908   0.092   0.251
    79   98     A      0.987   0.013   0.136
    80   99     A      0.995   0.005   0.089
    81   100    A      0.974   0.026   0.133
    82   101    A      0.992   0.008   0.151
    83   102    A      0.998   0.002   0.090
    84   103    A      0.987   0.013   0.118
    85   104    A      0.980   0.020   0.062
    86   105    A      0.997   0.003   0.119
    87   106    A      0.994   0.006   0.131
    88   107    A      0.985   0.015   0.114
    89   108    A      0.991   0.009   0.059
    90   109    A      0.923   0.077   0.101
    91   110    A      0.997   0.003   0.203
    92   111    A      0.982   0.018   0.064
    93   112    A      0.996   0.004   0.110
    94   113    A      0.984   0.016   0.155
    95   114    A      0.996   0.004   0.099
    96   115    A      0.982   0.018   0.144
    97   116    A      0.980   0.020   0.122
    98   117    A      0.985   0.015   0.236
    99   118    A      0.991   0.009   0.109
   100   119    A      0.988   0.012   0.088
   101   120    A      0.993   0.007   0.134
   102   121    A      0.995   0.005   0.133
   103   122    A      0.988   0.012   0.190
   104   123    A      0.993   0.007   0.069
   105   124    A      0.990   0.010   0.060
   106   125    A      0.972   0.028   0.066
   107   126    A      0.990   0.010   0.137
   108   127    A      0.993   0.007   0.072
   109   128    A      0.953   0.047   0.131
   110   129    A      0.993   0.007   0.187
   111   130    A      0.997   0.003   0.176
   112   131    A      0.987   0.013   0.078
   113   132    A      0.971   0.029   0.146
   114   133    A      0.998   0.002   0.122
   115   134    A      0.995   0.005   0.157
   116   135    A      0.935   0.065   0.164
   117   136    A      0.992   0.008   0.097
   118   137    A      0.999   0.001   0.068
   119   138    A      0.978   0.022   0.197
   120   139    A      0.988   0.012   0.088
   121   140    A      0.998   0.002   0.039
   122   141    A      0.996   0.004   0.057
   123   142    A      0.977   0.023   0.126
   124   143    A      0.988   0.012   0.114
   125   144    A      0.993   0.007   0.130
   126   145    A      0.996   0.004   0.116
   127   146    A      0.993   0.007   0.263
   128   147    A      0.977   0.023   0.079
   129   148    A      0.984   0.016   0.128
   130   149    A      0.915   0.085   0.096
   131   150    A      0.989   0.011   0.188
   132   151    A      0.972   0.028   0.098
   133   152    A      0.995   0.005   0.169
   134   153    A      0.990   0.010   0.044
   135   154    A      0.946   0.054   0.057
   136   155    A      0.998   0.002   0.172
   137   156    A      0.996   0.004   0.064
   138   157    A      0.996   0.004   0.162
   139   158    A      0.985   0.015   0.079
   140   159    A      0.954   0.046   0.280
   141   160    A      0.987   0.013   0.288
   142   161    A      0.967   0.033   0.562
   143   162    A      0.969   0.031   0.134
   144   163    A      0.983   0.017   0.163
   145   164    A      0.989   0.011   0.070
   146   165    A      0.992   0.008   0.075
   147   166    A      0.992   0.008   0.073
   148   167    A      0.935   0.065   0.157
   149   168    A      0.996   0.004   0.061
   150   169    A      0.952   0.048   0.134
   151   170    A      0.988   0.012   0.087
   152   171    A      0.976   0.024   0.127
   153   172    A      0.980   0.020   0.052
   154   173    A      0.986   0.014   0.237
   155   174    A      0.972   0.028   0.192
   156   175    A      0.938   0.062   0.124
   157   176    A      0.982   0.018   0.206
   158   177    A      0.844   0.156   0.175
   159   178    A      0.966   0.034   0.127
   160   179    A      0.973   0.027   0.136
   161   180    A      0.959   0.041   0.127
   162   181    A      0.907   0.093   0.183
   163   182    A      0.947   0.053   0.194
   164   183    A      0.983   0.017   0.085
   165   184    A      0.896   0.104   0.263
   166   185    A      0.993   0.007   0.114
   167   186    A      0.991   0.009   0.069
   168   187    A      0.989   0.011   0.059
   169   188    A      0.889   0.111   0.189
   170   189    A      0.986   0.014   0.096
   171   190    A      0.971   0.029   0.092
   172   191    A      0.985   0.015   0.065
   173   192    A      0.976   0.024   0.120
   174   193    A      0.972   0.028   0.197
   175   194    A      0.986   0.014   0.142
   176   195    A      0.955   0.045   0.093
   177   196    A      0.979   0.021   0.053
   178   197    A      0.999   0.001   0.171
   179   198    A      0.995   0.005   0.039
   180   199    A      0.995   0.005   0.064
   181   200    A      0.972   0.028   0.195
   182   201    A      0.999   0.001   0.149
   183   202    A      0.983   0.017   0.111
   184   203    A      0.987   0.013   0.046
   185   204    A      0.990   0.010   0.066
   186   205    A      0.904   0.096   0.072
   187   206    A      0.980   0.020   0.196
   188   207    A      0.946   0.054   0.485
   189   208    A      0.971   0.029   0.151
   190   209    A      0.968   0.032   0.120
   191   210    A      0.967   0.033   0.169
   192   211    A      0.992   0.008   0.049
   193   212    A      0.992   0.008   0.101
   194   213    A      0.990   0.010   0.137
   195   214    A      0.995   0.005   0.049
   196   215    A      0.993   0.007   0.117
   197   216    A      0.995   0.005   0.076
   198   217    A      0.992   0.008   0.082
   199   218    A      0.995   0.005   0.150
   200   219    A      0.988   0.012   0.113
   201   220    A      0.993   0.007   0.136
   202   221    A      0.995   0.005   0.052
   203   222    A      0.986   0.014   0.133
   204   223    A      0.959   0.041   0.158
   205   224    A      0.996   0.004   0.073
   206   225    A      0.968   0.032   0.101
   207   226    A      0.982   0.018   0.071
   208   227    A      0.974   0.026   0.115
   209   228    A      0.995   0.005   0.184
   210   229    A      0.991   0.009   0.146
   211   230    A      0.890   0.110   0.176
   212   231    A      0.104   0.896   0.147
   213   232    A      0.982   0.018   0.090
   214   233    A      0.990   0.010   0.132
   215   234    A      0.954   0.046   0.142
   216   235    A      0.984   0.016   0.117
   217   236    A      0.994   0.006   0.041
   218   237    A      0.975   0.025   0.103
   219   238    A      0.995   0.005   0.103
   220   239    A      0.996   0.004   0.037
   221   240    A      0.993   0.007   0.118
   222   241    A      0.994   0.006   0.137
   223   242    A      0.996   0.004   0.046
   224   243    A      0.972   0.028   0.137
   225   244    A      0.989   0.011   0.123
   226   245    A      0.993   0.007   0.148
   227   246    A      0.929   0.071   0.135
   228   247    A      0.853   0.147   0.119
   229   248    A      0.995   0.005   0.079
   230   249    A      0.951   0.049   0.138
   231   250    A      0.993   0.007   0.081
   232   251    A      0.992   0.008   0.078
   233   252    A      0.989   0.011   0.150
   234   253    A      0.998   0.002   0.080
   235   254    A      0.996   0.004   0.121
   236   255    A      0.987   0.013   0.084
   237   256    A      0.998   0.002   0.076
   238   257    A      0.997   0.003   0.065
   239   258    A      0.994   0.006   0.070
   240   259    A      0.990   0.010   0.094
   241   260    A      0.988   0.012   0.115
   242   261    A      0.998   0.002   0.116
   243   262    A      0.994   0.006   0.089
   244   263    A      0.978   0.022   0.119
   245   264    A      0.994   0.006   0.074
   246   265    A      0.999   0.001   0.099
   247   266    A      0.933   0.067   0.211
   248   267    A      0.997   0.003   0.080
   249   268    A      0.986   0.014   0.136
   250   269    A      0.917   0.083   0.182
   251   270    A      0.946   0.054   0.194
   252   271    A      0.913   0.087   0.185
   253   272    A      0.984   0.016   0.199
   254   273    A      0.991   0.009   0.142
   255   274    A      0.943   0.057   0.177
   256   275    A      0.984   0.016   0.131
   257   276    A      0.976   0.024   0.149
   258   277    A      0.982   0.018   0.048
   259   278    A      0.975   0.025   0.114
   260   279    A      0.997   0.003   0.186
   261   280    A      0.995   0.005   0.053
   262   281    A      0.969   0.031   0.089
   263   282    A      0.988   0.012   0.195
   264   283    A      0.975   0.025   0.203
   265   284    A      0.963   0.037   0.216
   266   285    A      0.974   0.026   0.140
   267   286    A      0.993   0.007   0.068
   268   287    A      0.976   0.024   0.209
   269   288    A      0.998   0.002   0.045
   270   289    A      0.995   0.005   0.100
   271   290    A      0.992   0.008   0.048
   272   291    A      0.995   0.005   0.091
   273   292    A      0.996   0.004   0.072
   274   293    A      0.986   0.014   0.076
   275   294    A      0.996   0.004   0.074
   276   295    A      0.997   0.003   0.116
   277   296    A      0.999   0.001   0.116
   278   297    A      0.987   0.013   0.052
   279   298    A      0.983   0.017   0.105
   280   299    A      0.988   0.012   0.027
   281   300    A      0.986   0.014   0.065
   282   301    A      0.985   0.015   0.167
   283   302    A      0.996   0.004   0.125
   284   303    A      0.932   0.068   0.150
   285   304    A      0.998   0.002   0.130
   286   305    A      0.994   0.006   0.117
   287   306    A      0.979   0.021   0.124
   288   307    A      0.983   0.017   0.067
   289   308    A      0.972   0.028   0.079
   290   309    A      0.983   0.017   0.193
   291   310    A      0.984   0.016   0.090
   292   311    A      0.976   0.024   0.099
   293   312    A      0.982   0.018   0.070
   294   313    A      0.993   0.007   0.104
   295   314    A      0.990   0.010   0.114
   296   315    A      0.992   0.008   0.220
   297   316    A      0.967   0.033   0.102
   298   317    A      0.990   0.010   0.033
   299   318    A      0.974   0.026   0.082
   300   319    A      0.992   0.008   0.041
   301   320    A      0.992   0.008   0.078
   302   321    A      0.967   0.033   0.137
   303   322    A      0.988   0.012   0.060
   304   323    A      0.994   0.006   0.063
   305   324    A      0.994   0.006   0.139
   306   325    A      0.988   0.012   0.100
   307   326    A      0.993   0.007   0.084
   308   327    A      0.990   0.010   0.089
   309   328    A      0.986   0.014   0.113
   310   329    A      0.985   0.015   0.104
   311   330    A      0.962   0.038   0.126
   312   7      B      0.950   0.050   0.304
   313   8      B      0.945   0.055   0.109
   314   9      B      0.883   0.117   0.064
   315   10     B      0.979   0.021   0.248
   316   11     B      0.982   0.018   0.098
   317   12     B      0.990   0.010   0.056
   318   13     B      0.968   0.032   0.134
   319   14     B      0.995   0.005   0.051
   320   15     B      0.968   0.032   0.249
   321   16     B      0.958   0.042   0.189
   322   17     B      0.983   0.017   0.126
   323   18     B      0.970   0.030   0.079
   324   19     B      0.991   0.009   0.058
   325   20     B      0.984   0.016   0.103
   326   21     B      0.978   0.022   0.087
   327   22     B      0.983   0.017   0.035
   328   23     B      0.974   0.026   0.082
   329   24     B      0.994   0.006   0.058
   330   25     B      0.963   0.037   0.047
   331   26     B      0.964   0.036   0.182
   332   27     B      0.945   0.055   0.211
   333   28     B      0.913   0.087   0.100
   334   29     B      0.980   0.020   0.075
   335   30     B      0.995   0.005   0.087
   336   31     B      0.990   0.010   0.108
   337   32     B      0.980   0.020   0.104
   338   33     B      0.977   0.023   0.180
   339   34     B      0.950   0.050   0.246
   340   35     B      0.990   0.010   0.195
   341   36     B      0.980   0.020   0.133
   342   37     B      0.832   0.168   0.347
   343   38     B      0.910   0.090   0.450
   344   39     B      0.993   0.007   0.252
   345   40     B      0.967   0.033   0.120
   346   41     B      0.997   0.003   0.520
   347   42     B      0.983   0.017   0.238
   348   43     B      0.984   0.016   0.087
   349   44     B      0.978   0.022   0.106
   350   45     B      0.977   0.023   0.231
   351   46     B      0.988   0.012   0.090
   352   47     B      0.996   0.004   0.057
   353   48     B      0.979   0.021   0.133
   354   49     B      0.981   0.019   0.097
   355   50     B      0.997   0.003   0.108
   356   51     B      0.977   0.023   0.116
   357   52     B      0.995   0.005   0.190
   358   53     B      0.994   0.006   0.111
   359   54     B      0.995   0.005   0.127
   360   55     B      0.989   0.011   0.135
   361   56     B      0.993   0.007   0.136
   362   57     B      0.994   0.006   0.070
   363   58     B      0.986   0.014   0.091
   364   59     B      0.975   0.025   0.114
   365   60     B      0.991   0.009   0.058
   366   61     B      0.997   0.003   0.023
   367   62     B      0.986   0.014   0.045
   368   63     B      0.996   0.004   0.190
   369   64     B      0.997   0.003   0.083
   370   65     B      0.980   0.020   0.190
   371   66     B      0.991   0.009   0.397
   372   67     B      0.983   0.017   0.142
   373   68     B      0.994   0.006   0.058
   374   69     B      0.988   0.012   0.236
   375   70     B      0.919   0.081   0.255
   376   71     B      0.924   0.076   0.180
   377   72     B      0.996   0.004   0.160
   378   73     B      0.980   0.020   0.122
   379   74     B      0.976   0.024   0.119
   380   75     B      0.900   0.100   0.292
   381   76     B      0.907   0.093   0.195
   382   77     B      0.957   0.043   0.192
   383   78     B      0.992   0.008   0.167
   384   79     B      0.797   0.203   0.291
   385   80     B      0.917   0.083   0.548
   386   81     B      0.818   0.182   0.333
   387   82     B      0.912   0.088   0.736
   388   83     B      0.976   0.024   0.336
   389   84     B      0.992   0.008   0.603
   390   85     B      0.984   0.016   0.309
   391   86     B      0.973   0.027   0.240
   392   87     B      0.989   0.011   0.372
   393   88     B      0.973   0.027   0.232
   394   89     B      0.930   0.070   0.259
   395   90     B      0.981   0.019   0.119
   396   91     B      0.986   0.014   0.039
   397   92     B      0.992   0.008   0.110
   398   93     B      0.995   0.005   0.113
   399   94     B      0.994   0.006   0.105
   400   95     B      0.994   0.006   0.075
   401   96     B      0.994   0.006   0.101
   402   97     B      0.989   0.011   0.186
   403   98     B      0.988   0.012   0.144
   404   99     B      0.870   0.130   0.298
   405   100    B      0.974   0.026   0.116
   406   101    B      0.997   0.003   0.074
   407   102    B      0.994   0.006   0.060
   408   103    B      0.994   0.006   0.116
   409   104    B      0.992   0.008   0.243
   410   105    B      0.992   0.008   0.101
   411   106    B      0.993   0.007   0.060
   412   107    B      0.979   0.021   0.113
   413   108    B      0.984   0.016   0.120
   414   109    B      0.951   0.049   0.091
   415   110    B      0.978   0.022   0.138
   416   111    B      0.993   0.007   0.097
   417   112    B      0.984   0.016   0.116
   418   113    B      0.996   0.004   0.081
   419   114    B      0.958   0.042   0.133
   420   115    B      0.953   0.047   0.212
   421   116    B      0.972   0.028   0.171
   422   117    B      0.695   0.305   0.237
   423   118    B      0.940   0.060   0.211
   424   119    B      0.939   0.061   0.258
   425   120    B      0.979   0.021   0.126
   426   121    B      0.985   0.015   0.097
   427   122    B      0.982   0.018   0.313
   428   123    B      0.993   0.007   0.131
   429   124    B      0.991   0.009   0.121
   430   125    B      0.993   0.007   0.120
   431   126    B      0.990   0.010   0.134
   432   127    B      0.985   0.015   0.151
   433   128    B      0.985   0.015   0.071
   434   129    B      0.976   0.024   0.100
   435   130    B      0.992   0.008   0.163
   436   131    B      0.995   0.005   0.072
   437   132    B      0.991   0.009   0.070
   438   133    B      0.999   0.001   0.105
   439   134    B      0.994   0.006   0.074
   440   135    B      0.990   0.010   0.187
   441   136    B      0.987   0.013   0.190
   442   137    B      0.992   0.008   0.096
   443   138    B      0.996   0.004   0.040
   444   139    B      0.997   0.003   0.113
   445   140    B      0.996   0.004   0.156
   446   141    B      0.993   0.007   0.201
   447   142    B      0.993   0.007   0.051
   448   143    B      0.996   0.004   0.049
   449   144    B      0.990   0.010   0.203
   450   145    B      0.953   0.047   0.133
   451   146    B      0.968   0.032   0.246
   452   147    B      0.822   0.178   0.121
   453   148    B      0.995   0.005   0.139
   454   149    B      0.963   0.037   0.142
   455   150    B      0.981   0.019   0.131
   456   151    B      0.882   0.118   0.080
   457   152    B      0.968   0.032   0.083
   458   153    B      0.992   0.008   0.047
   459   154    B      0.944   0.056   0.123
   460   155    B      0.968   0.032   0.118
   461   156    B      0.897   0.103   0.161
   462   157    B      0.961   0.039   0.135
   463   158    B      0.994   0.006   0.056
   464   159    B      0.989   0.011   0.070
   465   160    B      0.998   0.002   0.211
   466   161    B      0.992   0.008   0.060
   467   162    B      0.993   0.007   0.055
   468   163    B      0.987   0.013   0.100
   469   164    B      0.995   0.005   0.251
   470   165    B      0.970   0.030   0.134
   471   166    B      0.955   0.045   0.173
   472   167    B      0.987   0.013   0.167
   473   168    B      0.983   0.017   0.132
   474   169    B      0.941   0.059   0.103
   475   170    B      0.990   0.010   0.076
   476   171    B      0.978   0.022   0.070
   477   172    B      0.978   0.022   0.077
   478   173    B      0.998   0.002   0.074
   479   174    B      0.994   0.006   0.069
   480   175    B      0.957   0.043   0.188
   481   176    B      0.991   0.009   0.167
   482   177    B      0.996   0.004   0.160
   483   178    B      0.984   0.016   0.059
   484   179    B      0.994   0.006   0.055
   485   180    B      0.997   0.003   0.097
   486   181    B      0.992   0.008   0.055
   487   182    B      0.994   0.006   0.066
   488   183    B      0.989   0.011   0.069
   489   184    B      0.996   0.004   0.162
   490   185    B      0.994   0.006   0.194
   491   186    B      0.992   0.008   0.132
   492   187    B      0.991   0.009   0.216
   493   188    B      0.980   0.020   0.127
   494   189    B      0.998   0.002   0.098
   495   190    B      0.983   0.017   0.089
   496   191    B      0.989   0.011   0.145
   497   192    B      0.996   0.004   0.040
   498   193    B      0.963   0.037   0.100
   499   194    B      0.893   0.107   0.113
   500   195    B      0.979   0.021   0.118
   501   196    B      0.964   0.036   0.268
   502   197    B      0.911   0.089   0.329
   503   198    B      0.979   0.021   0.101
   504   199    B      0.986   0.014   0.303
   505   200    B      0.852   0.148   0.093
   506   201    B      0.989   0.011   0.132
   507   202    B      0.982   0.018   0.128
   508   203    B      0.998   0.002   0.239
   509   204    B      0.988   0.012   0.068
   510   205    B      0.990   0.010   0.045
   511   206    B      0.959   0.041   0.275
   512   207    B      0.979   0.021   0.143
   513   208    B      0.927   0.073   0.092
   514   209    B      0.903   0.097   0.174
   515   210    B      0.972   0.028   0.173
   516   211    B      0.983   0.017   0.154
   517   212    B      0.991   0.009   0.166
   518   213    B      0.861   0.139   0.305
   519   214    B      0.983   0.017   0.112
   520   215    B      0.978   0.022   0.072
   521   216    B      0.912   0.088   0.351
   522   217    B      0.971   0.029   0.201
   523   218    B      0.952   0.048   0.190
   524   219    B      0.982   0.018   0.194
   525   220    B      0.964   0.036   0.138
   526   221    B      0.897   0.103   0.255
   527   222    B      0.979   0.021   0.171
   528   223    B      0.967   0.033   0.073
   529   224    B      0.971   0.029   0.216
   530   225    B      0.969   0.031   0.213
   531   226    B      0.957   0.043   0.099
   532   227    B      0.992   0.008   0.090
   533   228    B      0.893   0.107   0.226
   534   229    B      0.985   0.015   0.098
   535   230    B      0.950   0.050   0.203
   536   231    B      0.986   0.014   0.124
   537   232    B      0.948   0.052   0.166
   538   233    B      0.990   0.010   0.164
   539   234    B      0.962   0.038   0.161
   540   235    B      0.990   0.010   0.071
   541   236    B      0.982   0.018   0.167
   542   237    B      0.967   0.033   0.171
   543   238    B      0.995   0.005   0.242
   544   239    B      0.986   0.014   0.110
   545   240    B      0.991   0.009   0.091
   546   241    B      0.992   0.008   0.248
   547   242    B      0.987   0.013   0.173
   548   243    B      0.989   0.011   0.077
   549   244    B      0.982   0.018   0.166
   550   245    B      0.987   0.013   0.152
   551   246    B      0.942   0.058   0.131
   552   247    B      0.985   0.015   0.116
   553   248    B      0.968   0.032   0.092
   554   249    B      0.993   0.007   0.131
   555   250    B      0.853   0.147   0.114
   556   251    B      0.920   0.080   0.220
   557   252    B      0.989   0.011   0.168
   558   253    B      0.989   0.011   0.156
   559   254    B      0.808   0.192   0.504
   560   255    B      0.928   0.072   0.254
   561   256    B      0.919   0.081   0.120
   562   257    B      0.607   0.393   0.166
   563   258    B      0.925   0.075   0.199
   564   259    B      0.463   0.537   0.314
   565   260    B      0.973   0.027   0.208
   566   261    B      0.976   0.024   0.106
   567   34     C      0.926   0.074   0.363
   568   35     C      0.956   0.044   0.308
   569   36     C      0.919   0.081   0.803
   570   37     C      0.935   0.065   0.170
   571   38     C      0.951   0.049   0.247
   572   39     C      0.930   0.070   0.138
   573   40     C      0.722   0.278   0.362
   574   41     C      0.879   0.121   0.176
   575   42     C      0.573   0.427   0.596
   576   43     C      0.892   0.108   0.069
   577   44     C      0.885   0.115   0.214
   578   45     C      0.966   0.034   0.293
   579   46     C      0.973   0.027   0.360
   580   47     C      0.944   0.056   0.230
   581   48     C      0.970   0.030   0.179
   582   49     C      0.936   0.064   0.068
   583   50     C      0.960   0.040   0.165
   584   51     C      0.963   0.037   0.146
   585   52     C      0.993   0.007   0.211
   586   53     C      0.965   0.035   0.077
   587   54     C      0.855   0.145   0.142
   588   55     C      0.948   0.052   0.099
   589   56     C      0.981   0.019   0.179
   590   57     C      0.989   0.011   0.026
   591   58     C      0.981   0.019   0.083
   592   59     C      0.962   0.038   0.128
   593   60     C      0.976   0.024   0.259
   594   61     C      0.985   0.015   0.162
   595   62     C      0.988   0.012   0.101
   596   63     C      0.925   0.075   0.117
   597   64     C      0.935   0.065   0.307
   598   65     C      0.974   0.026   0.154
   599   66     C      0.991   0.009   0.118
   600   67     C      0.954   0.046   0.207
   601   0      D      0.993   0.007   0.233
   602   1      D      0.948   0.052   0.170
   603   2      D      0.992   0.008   0.052
   604   3      D      0.943   0.057   0.093
   605   4      D      0.852   0.148   0.180
   606   5      D      0.985   0.015   0.122
   607   6      D      0.946   0.054   0.162
   608   7      D      0.975   0.025   0.205
   609   8      D      0.991   0.009   0.074
   610   9      D      0.987   0.013   0.150
   611   10     D      0.995   0.005   0.090
   612   11     D      0.978   0.022   0.095
   613   12     D      0.964   0.036   0.167
   614   13     D      0.955   0.045   0.127
   615   14     D      0.916   0.084   0.300
   616   15     D      0.730   0.270   0.114
   617   16     D      0.970   0.030   0.141
   618   17     D      0.990   0.010   0.061
   619   18     D      0.898   0.102   0.077
   620   19     D      0.989   0.011   0.254
   621   20     D      0.994   0.006   0.141
   622   21     D      0.990   0.010   0.130
   623   22     D      0.981   0.019   0.169
   624   23     D      0.989   0.011   0.164
   625   24     D      0.993   0.007   0.035
   626   25     D      0.976   0.024   0.028
   627   26     D      0.946   0.054   0.108
   628   27     D      0.995   0.005   0.012
   629   28     D      0.945   0.055   0.148
   630   29     D      0.986   0.014   0.078
   631   30     D      0.927   0.073   0.044
   632   31     D      0.963   0.037   0.123
   633   32     D      0.994   0.006   0.099
   634   33     D      0.990   0.010   0.107
   635   34     D      0.976   0.024   0.067
   636   35     D      0.996   0.004   0.096
   637   36     D      0.992   0.008   0.049
   638   37     D      0.960   0.040   0.086
   639   38     D      0.982   0.018   0.101
   640   39     D      0.988   0.012   0.194
   641   40     D      0.988   0.012   0.093
   642   41     D      0.974   0.026   0.134
   643   42     D      0.984   0.016   0.181
   644   43     D      0.983   0.017   0.118
   645   44     D      0.917   0.083   0.118
   646   45     D      0.992   0.008   0.198
   647   46     D      0.898   0.102   0.108
   648   47     D      0.919   0.081   0.161
   649   48     D      0.849   0.151   0.101
   650   49     D      0.720   0.280   0.160
   651   101    D      1.000   0.000   0.123
   652   102    D      0.923   0.077   0.022
   653   21     N      0.947   0.053   0.120
   654   22     N      0.943   0.057   0.063
   655   23     N      0.950   0.050   0.049
   656   24     N      0.961   0.039   0.107
   657   25     N      0.836   0.164   0.101
   658   26     N      0.844   0.156   0.077
   659   27     N      0.914   0.086   0.049
   660   28     N      0.790   0.210   0.071
   661   29     N      0.953   0.047   0.065
   662   30     N      0.965   0.035   0.083
   663   31     N      0.928   0.072   0.070
   664   32     N      0.947   0.053   0.108
   665   33     N      0.947   0.053   0.059
   666   34     N      0.947   0.053   0.108
   667   35     N      0.750   0.250   0.109
   668   36     N      0.969   0.031   0.100
   669   37     N      0.785   0.215   0.120
   670   38     N      0.703   0.297   0.085
   671   39     N      0.811   0.189   0.056
   672   40     N      0.913   0.087   0.077
   673   41     N      0.822   0.178   0.096
 average RSR value = 0.14306  sigma = 9.636689E-02
